# Supplementary material for: Dietary Plant and Animal Protein Sources Oppositely Modulate Fecal Bilophila and Lachnoclostridium in Vegetarians and Omnivores
Source: PubMed Central journal article supplement (PMC9045121; doi:10.1128/spectrum.02047-21), 2022-03-14
Supplement: spectrum02047-21_supp_1_seq7.pdf [file spectrum02047-21_supp_1_seq7.pdf]

## Supplementary Materials and Methods

### Fecal sample collection and genome DNA extraction

Using a stool collection kit (GenoRx Co. Ltd, Taipei, Taiwan), each participant collected a fecal sample at home and sent the sample to the lab in cold storage within 24 h of collection. The samples were then aliquoted and stored at -80°C before use in experiments. Total genomic DNA was extracted from samples using the CTAB/SDS method. DNA concentration and purity were assessed on 1% agarose gels. DNA samples were diluted to 1 ng/μL with sterile water. The DNA extraction protocol was performed by GenoRx Co., Ltd.

### 16S rRNA gene amplicon sequencing

16S rRNA gene amplicon sequencing was performed by GenoRx Co., Ltd. Briefly, 16S rRNA sequencing libraries were prepared according to the manufacturer's instructions (Illumina, CA, USA). DNA (12.5 ng) was used for PCR amplification of the 16S rRNA gene V3 and V4 regions. The PCR primers contained overhang adapter sequences followed by the full-length primer sequences: Forward: 5'-TCGTCGGCAGCGTCAGATGTGTATAAGAGACAGCCTACGGGNGGCWGCAG; Reverse: 5'-GTCTCGTGGGCTCGGAGATGTGTATAAGAGACAGGACTACHVGGGTATCTAATCC. PCR products were purified with AMPure XP beads (Beckman Coulter, CA, USA). Then, the purified products were subjected to a second PCR with primers from the Nextera XT Index kit (Illumina) to add dual indices and Illumina sequencing adapters. After the second PCR, final libraries (~630 bp) were purified with AMPure XP beads and used in next generation sequencing.

### MiSeq-based high throughput sequencing

The concentrations of 16S rRNA sequencing libraries were determined by real-time quantitative PCR with Illumina adapter-specific primers provided in the KAPA library quantification kit (Merck KGaA, Darmstadt, Germany). Libraries were denatured and sequenced using an Illumina MiSeq system with reagent V3 for pair-end sequencing (2\*250 bp). The Real Time Analysis software (RTA), MiSeq Control software (MCS), and MiSeq Report software (MSR) were utilized on the MiSeq system, as appropriate. Analyses were performed using FASTQ files generated by MiSeq Report. The method was conducted by GenoRx Co., Ltd.

### Data analysis of fecal samples

After demultiplexing, the raw reads were further processed with DADA2 (version 1.10.1) to obtain amplicons with single-nucleotide resolution(1, 2). The DADA2 workflow includes quality filtering, dereplication, learning the dataset-specific error model, ASV inference, and chimera removal. Trimming and filtering were performed with at least 12 perfectly matched bases in each read pair. The DADA2 algorithm resolves exact amplicon sequence variants (ASVs) with single-nucleotide resolution from 16S rRNA gene with a near-zero error rate. For each representative sequence, the RDP classifier (v.2.2) algorithm(3) was used to annotate taxonomy

classification based on the information retrieved from the Silva Database v.132(4, 5). Annotation was performed with an 80% minimum confidence threshold to record an assignment. Sequences with one-time occurrence (singletons) or that were present in only one sample were filtered out. To analyze the sequence similarities among different ASVs, multiple sequence alignment was conducted using PyNAST software (v.1.2)(6) against the core-set dataset in the Silva database.

To normalize the variations in sequence depth across samples, ASV abundance information was rarefied to the minimum sequence depth using the QIIME script (`single_rarefaction.py`). Subsequent analysis of alpha and beta diversities was both performed on the normalized data. Alpha diversity is indicative of the species complexity within individual samples based on seven different output criteria from the QIIME pipeline, including observed-ASVs, Shannon entropy and Chao index. Observed-ASVs is the number of different species represented in the microbial community. Community richness was assessed by the Chao1 and ACE indices(7). Beta diversity analysis was used to evaluate the differences among samples in terms of species complexity. Principal Coordinate Analysis (PCoA) using Bray–Curtis distance was performed on the distance matrix to acquire principal coordinates for visualization of sophisticated and multidimensional data(8).

## References

1. Callahan BJ, McMurdie PJ, Rosen MJ, Han AW, Johnson AJ, Holmes SP. 2016. DADA2: High-resolution sample inference from Illumina amplicon data. *Nat Methods* 13:581-3.
2. Callahan BJ, McMurdie PJ, Holmes SP. 2017. Exact sequence variants should replace operational taxonomic units in marker-gene data analysis. *ISME J* 11:2639-2643.
3. Wang Q, Garrity GM, Tiedje JM, Cole JR. 2007. Naive Bayesian classifier for rapid assignment of rRNA sequences into the new bacterial taxonomy. *Appl Environ Microbiol* 73:5261-7.
4. Quast C, Pruesse E, Yilmaz P, Gerken J, Schweer T, Yarza P, Peplies J, Glockner FO. 2013. The SILVA ribosomal RNA gene database project: improved data processing and web-based tools. *Nucleic Acids Res* 41:D590-6.
5. Yilmaz P, Parfrey LW, Yarza P, Gerken J, Pruesse E, Quast C, Schweer T, Peplies J, Ludwig W, Glockner FO. 2014. The SILVA and "All-species Living Tree Project (LTP)" taxonomic frameworks. *Nucleic Acids Res* 42:D643-8.
6. Caporaso JG, Bittinger K, Bushman FD, DeSantis TZ, Andersen GL, Knight R. 2010. PyNAST: a flexible tool for aligning sequences to a template alignment. *Bioinformatics* 26:266-7.
7. Schloss PD, Westcott SL, Ryabin T, Hall JR, Hartmann M, Hollister EB, Lesniewski RA, Oakley BB, Parks DH, Robinson CJ, Sahl JW, Stres B, Thallinger GG, Van Horn DJ, Weber CF. 2009. Introducing mothur: open-source, platform-independent, community-supported software for describing and comparing microbial communities. *Appl Environ Microbiol* 75:7537-41.
8. Jiang XT, Peng X, Deng GH, Sheng HF, Wang Y, Zhou HW, Tam NF. 2013. Illumina sequencing of 16S rRNA tag revealed spatial variations of bacterial communities in a mangrove wetland. *Microb Ecol* 66:96-104.

**Supplemental Table 1.**

Daily energy and Macronutrient intake of the study participants

|                             | <b>Vegetarian</b> | <b>Omnivore</b> | <b>p-Value</b> | <b>q-Value</b> |
|-----------------------------|-------------------|-----------------|----------------|----------------|
| <b>N</b>                    | 7                 | 9               |                |                |
| <b>Age</b>                  |                   |                 |                |                |
| <65, n (%)                  | 7 (100)           | 9 (100)         |                |                |
| ≥65, n (%)                  | 0 (0)             | 0 (0)           |                |                |
| <b>Gender</b>               |                   |                 |                |                |
| Male, n (%)                 | 4 (57.1)          | 2 (22.2)        |                |                |
| Female, n (%)               | 3 (42.9)          | 7 (77.8)        |                |                |
| <b>Energy (kcal)</b>        | 1609.7 ± 222.2    | 1650.6 ± 240.8  | 0.73           | 0.94           |
| <b>Protein (g)</b>          | 53.7 ± 11.3       | 67.8 ± 14.7     | 0.05           | 0.22           |
| Plant-derived protein       | 45.1 ± 12.5       | 25.3 ± 4.9      | <0.01*         | <b>0.02#</b>   |
| Animal-derived protein      | 8.5 ± 7.4         | 42.5 ± 13.5     | <0.01*         | <b>0.02#</b>   |
| <b>Fat (g)</b>              | 61.5 ± 13.9       | 63.2 ± 18.5     | 0.84           | 0.98           |
| <b>Saturated fat (g)</b>    | 14.9 ± 5.6        | 18.0 ± 5.1      | 0.26           | 0.41           |
| <b>Transfatty acid (mg)</b> | 284.3 ± 116.5     | 365.7 ± 185.1   | 0.33           | 0.43           |
| <b>Carbohydrate (g)</b>     | 219.3 ± 28.5      | 202.8 ± 30.3    | 0.38           | 0.46           |
| <b>Fiber (g)</b>            | 20.4 ± 5.2        | 13.3 ± 3.9      | 0.01*          | <b>0.04#</b>   |
| <b>Sodium (mg)</b>          | 1004.1 ± 513.4    | 1453.4 ± 716.2  | 0.18           | 0.32           |
| <b>Potassium (mg)</b>       | 2013.1 ± 534.9    | 1971.0 ± 786.5  | 0.91           | 1.00           |
| <b>Calcium (mg)</b>         | 594.0 ± 172.6     | 533.5 ± 365.6   | 0.69           | 0.35           |
| <b>Magnesium (mg)</b>       | 291.4 ± 131.2     | 239.9 ± 99.6    | 0.39           | 0.30           |
| <b>Phosphorus (mg)</b>      | 916.1 ± 290.4     | 893.9 ± 238.8   | 0.87           | 0.96           |
| <b>Cholesterol (mg)</b>     | 182.9 ± 102.7     | 321.0 ± 132.0   | 0.04*          | 0.07           |

Data were presented as mean ± standard deviation.

\* $p < 0.05$ , # $q < 0.05$  between vegetarians and omnivores.

**Supplemental Table 2.**

Daily monosaccharide intake of the study participants

|                     | <b>Vegetarian</b> | <b>Omnivore</b> | <b><i>p</i>-Value</b> | <b><i>q</i>-Value</b> |
|---------------------|-------------------|-----------------|-----------------------|-----------------------|
| <b>Glucose (g)</b>  | 10.0 ± 4.5        | 6.1 ± 2.8       | 0.04*                 | 0.28                  |
| <b>Fructose (g)</b> | 9.2 ± 4.6         | 5.3 ± 3.1       | 0.06                  | 0.23                  |
| <b>Maltose (g)</b>  | 1.0 ± 0.8         | 1.2 ± 0.5       | 0.61                  | 1.00                  |
| <b>Sucrose (g)</b>  | 8.9 ± 4.8         | 9.6 ± 4.1       | 0.73                  | 0.88                  |
| <b>Lactose (g)</b>  | 1.5 ± 3.4         | 3.5 ± 4.4       | 0.35                  | 0.73                  |

Data were presented as mean ± standard deviation.

\**p* < 0.05 between vegetarians and omnivores.

**Supplemental Table 3.**  
Daily fatty acid intake of the study participants

|                                         | Vegetarian       | Omnivore         | p-Value | q-Value           |
|-----------------------------------------|------------------|------------------|---------|-------------------|
| <b><u>Saturated fats (mg)</u></b>       | 14679.1 ± 5770.6 | 16642.0 ± 5534.9 | 0.50    | 0.57              |
| Butyric acid (C4)                       | 30.0 ± 62.8      | 81.1 ± 104.8     | 0.28    | 0.53              |
| Caproic acid (C6)                       | 28.3 ± 43.8      | 85.2 ± 86.8      | 0.14    | 0.54              |
| Caprylic acid (C8)                      | 217.7 ± 442.0    | 59.1 ± 71.7      | 0.30    | 0.78              |
| Capric acid (C10)                       | 215.5 ± 442.0    | 122.2 ± 139.8    | 0.45    | 0.83              |
| Lauric acid (C12)                       | 1296.0 ± 2651.2  | 200.6 ± 215.0    | 0.23    | 0.55              |
| Tridecylic acid(C13)                    | 1.9 ± 2.3        | 3.2 ± 3.7        | 0.33    | 0.59              |
| Myristic acid (C14)                     | 724.9 ± 917.7    | 740.9 ± 469.9    | 0.97    | 0.54              |
| Pentadecanoic acid (C15)                | 2.0 ± 2.6        | 5.8 ± 3.7        | 0.04*   | 0.07              |
| Palmitic acid (C16)                     | 8629.4 ± 1630.9  | 10888.5 ± 3557.0 | 0.14    | 0.41              |
| Margaric acid (C17)                     | 59.0 ± 23.5      | 106.1 ± 36.7     | 0.01*   | 0.09              |
| Stearic acid (C18)                      | 2824.5 ± 853.5   | 3854.4 ± 1224.8  | 0.11    | 0.26              |
| Heptadecanoic acid (C19)                | 5.0 ± 13.1       | 3.9 ± 4.2        | 0.83    | 0.08              |
| Arachidic acid (C20)                    | 203.7 ± 63.5     | 192.6 ± 54.7     | 0.70    | 0.89              |
| Behenic acid (C22)                      | 217.0 ± 55.7     | 175.8 ± 38.7     | 0.13    | 0.38              |
| Lignoceric acid (C24)                   | 106.4 ± 39.2     | 69.0 ± 14.8      | 0.02*   | 0.08              |
| <b><u>Monounsaturated fats (mg)</u></b> | 17365.7 ± 3556.3 | 19040.5 ± 6191.6 | 0.54    | 0.86              |
| Myristol                                | 6.5 ± 9.3        | 18.8 ± 20.4      | 0.16    | 0.24              |
| Palmitoyl 16:1 (Palmitic acid)          | 293.9 ± 79.7     | 738.4 ± 323.9    | <0.01*  | 0.05 <sup>#</sup> |
| Oleic acid                              | 16898.1 ± 3512.3 | 17922.3 ± 5716.8 | 0.68    | 1.00              |
| Gadoleic Acid 20:1                      | 154.0 ± 36.1     | 310.6 ± 177.4    | 0.04*   | 0.07              |
| Erucic acid                             | 13.1 ± 5.0       | 50.4 ± 44.9      | 0.05*   | 0.07              |
| <b><u>Polyunsaturated fats (mg)</u></b> | 28280.3 ± 7242.2 | 24857.7 ± 9923.8 | 0.46    | 0.51              |
| Linoleic acid (LA) (g)                  | 25.1 ± 6.6       | 21.6 ± 8.5       | 0.38    | 0.49              |
| α-Linolenic acid (g)                    | 3.0 ± 0.7        | 2.5 ± 1.1        | 0.33    | 0.51              |
| Stearidonic acid (SDA)                  | 0.4 ± 0.5        | 19.4 ± 28.7      | 0.10    | 0.10              |
| Arachidonic acid (ETA)                  | 70.2 ± 34.5      | 174.9 ± 90.6     | 0.01*   | 0.07              |
| Eicosapentaenoic (EPA)                  | 10.0 ± 12.4      | 126.4 ± 151.0    | 0.06    | 0.07              |
| Clupanodonic acid (DPA)                 | 7.1 ± 4.4        | 95.9 ± 85.1      | 0.02*   | 0.02 <sup>#</sup> |
| Docosahexaenoic Acid (DHA)              | 39.3 ± 20.0      | 290.3 ± 276.4    | 0.03*   | 0.11              |

Data were presented as mean ± standard deviation.

\* $p < 0.05$ , <sup>#</sup> $q < 0.05$  between vegetarians and omnivores.

**Supplemental Table 4.**

Daily amino acid intake of the study participants

| Amino acid (mg)                  | Vegetarian       | Omnivore         | <i>p</i> -Value | <i>q</i> -Value |
|----------------------------------|------------------|------------------|-----------------|-----------------|
| <b>Essential amino acids</b>     |                  |                  |                 |                 |
| Threonine                        | 1773.7 ± 383.5   | 2430.7 ± 735.7   | 0.05            | 0.18            |
| Valine                           | 2287.5 ± 514.9   | 3026.8 ± 800.5   | 0.09            | 0.28            |
| Methionine                       | 772.9 ± 171.4    | 1367.1 ± 463.3   | 0.01*           | 0.20            |
| Isoleucine                       | 2075.3 ± 449.4   | 2644.5 ± 728.7   | 0.09            | 0.30            |
| Leucine                          | 3900.5 ± 877.0   | 4942.3 ± 1348.1  | 0.10            | 0.28            |
| Phenylalanine                    | 2506.3 ± 570.0   | 2850.7 ± 712.3   | 0.31            | 0.48            |
| Lysine                           | 2408.5 ± 553.0   | 3875.1 ± 1419.6  | 0.02*           | 0.27            |
| Histidine                        | 1267.1 ± 277.1   | 1817.3 ± 512.3   | 0.02*           | 0.20            |
| Tryptophan                       | 437.0 ± 118.5    | 658.3 ± 209.0    | 0.03*           | 0.16            |
| <b>Non-essential amino acids</b> |                  |                  |                 |                 |
| Aspartic acid                    | 4398.9 ± 1046.9  | 5408.1 ± 1720.3  | 0.19            | 0.34            |
| Serine                           | 2503.6 ± 538.9   | 2795.4 ± 765.7   | 0.41            | 0.56            |
| Glutamate                        | 10751.1 ± 2786.2 | 11623.8 ± 2375.7 | 0.51            | 0.53            |
| Proline                          | 3424.0 ± 912.7   | 3655.7 ± 537.8   | 0.54            | 0.44            |
| Glycine                          | 1975.5 ± 494.8   | 2673.1 ± 712.9   | 0.05*           | 0.13            |
| Alanine                          | 2216.5 ± 462.5   | 3152.3 ± 937.7   | 0.03*           | 0.16            |
| Cysteine                         | 1529.2 ± 322.1   | 2111.1 ± 467.8   | 0.01*           | 0.24            |
| Tyrosine                         | 1850.2 ± 443.1   | 2303.1 ± 605.3   | 0.12            | 0.25            |
| Arginine                         | 3179.5 ± 882.5   | 3822.7 ± 1059.2  | 0.22            | 0.45            |

Data were presented as mean ± standard deviation.

\**p* < 0.05 between vegetarians and omnivores.

**Supplemental Table 5.**

Daily micronutrient intake of the study participants

|                            | <b>Vegetarian</b> | <b>Omnivore</b> | <b>p-Value</b> | <b>q-Value</b> |
|----------------------------|-------------------|-----------------|----------------|----------------|
| <b>Iron (mg)</b>           | 11.8 ± 2.9        | 13.1 ± 7.8      | 0.69           | 0.92           |
| <b>Zinc (mg)</b>           | 7.7 ± 1.8         | 9.5 ± 2.3       | 0.12           | 0.39           |
| <b>Copper (mg)</b>         | 0.1 ± 0.1         | 0.1 ± 0.0       | 0.20           | 0.60           |
| <b>Manganese (mg)</b>      | 0.3 ± 0.5         | 0.0 ± 0.0       | 0.19           | 0.73           |
| <b>Vitamin A (IU)</b>      | 10261.0 ± 3527.7  | 6628.4 ± 3869.9 | 0.07           | 0.34           |
| <b>Retinol (RE) (µg)</b>   | 1103.7 ± 352.1    | 764.2 ± 374.6   | 0.09           | 0.36           |
| <b>Alpha carotene (µg)</b> | 666.0 ± 616.2     | 268.8 ± 163.6   | 0.08           | 0.43           |
| <b>Beta carotene (µg)</b>  | 5591.5 ± 1968.8   | 3558.6 ± 2285.8 | 0.08           | 0.39           |
| <b>Vitamin E (mg)</b>      | 50.9 ± 34.0       | 33.2 ± 13.3     | 0.17           | 0.39           |
| <b>α-tocopherol (mg)</b>   | 21.9 ± 27.3       | 9.3 ± 6.4       | 0.20           | 0.57           |
| <b>β-tocopherol (mg)</b>   | 1.4 ± 0.6         | 1.0 ± 0.5       | 0.21           | 0.40           |
| <b>γ-tocopherol (mg)</b>   | 22.0 ± 6.3        | 18.2 ± 7.5      | 0.30           | 0.41           |
| <b>δ-tocopherol (mg)</b>   | 5.7 ± 1.7         | 4.6 ± 1.8       | 0.24           | 0.36           |
| <b>Thiamin (mg)</b>        | 0.8 ± 0.3         | 1.0 ± 0.4       | 0.52           | 0.38           |
| <b>Riboflavin (mg)</b>     | 0.9 ± 0.5         | 1.0 ± 0.2       | 0.62           | 0.32           |
| <b>Niacin (mg NE)</b>      | 15.6 ± 4.2        | 20.4 ± 3.9      | 0.02*          | 0.21           |
| <b>Pyridoxine (mg)</b>     | 1.2 ± 0.3         | 1.3 ± 0.2       | 0.36           | 0.37           |
| <b>Cobalamin (µg)</b>      | 1.20 ± 1.1        | 4.1 ± 2.8       | 0.02*          | 0.12           |
| <b>Folate (µg)</b>         | 304.2 ± 66.4      | 229.2 ± 56.7    | 0.03*          | 0.30           |
| <b>Ascorbic acid (mg)</b>  | 116.8 ± 23.6      | 113.2 ± 59.9    | 0.88           | 0.74           |

## Supplemental Table 6.

### Linear discriminant analysis (LDA) effect size (LEfSe) analysis

| Taxonomy                                                                                                  | Group | LDA score | p-value | q-value* |
|-----------------------------------------------------------------------------------------------------------|-------|-----------|---------|----------|
| p__Firmicutes.c__Bacilli.o__Lactobacillales.f__Lactobacillaceae.g__Lactobacillus                          | Veg   | 3.82      | 0.04    | ns       |
| p__Firmicutes.c__Bacilli.o__Lactobacillales.f__Lactobacillaceae                                           | Veg   | 3.82      | 0.04    | ns       |
| p__Fusobacteria.c__Fusobacteriia.o__Fusobacteriales.f__Fusobacteriaceae                                   | Veg   | 3.78      | 0.02    | ns       |
| p__Firmicutes.c__Bacilli.o__Lactobacillales.f__Carnobacteriaceae                                          | Veg   | 3.78      | 0.04    | ns       |
| p__Fusobacteria.c__Fusobacteriia.o__Fusobacteriales                                                       | Veg   | 3.77      | 0.03    | ns       |
| p__Fusobacteria.c__Fusobacteriia                                                                          | Veg   | 3.75      | 0.03    | ns       |
| p__Fusobacteria                                                                                           | Veg   | 3.74      | 0.03    | ns       |
| p__Fusobacteria.c__Fusobacteriia.o__Fusobacteriales.f__Fusobacteriaceae.g__Fusobacterium                  | Veg   | 3.74      | 0.03    | ns       |
| p__Firmicutes.c__Negativicutes.o__Selenomonadales.f__Veillonellaceae.g__Megasphaera                       | Veg   | 3.67      | 0.04    | ns       |
| p__Firmicutes.c__Clostridia.o__Clostridiales.f__Lachnospiraceae.g__Eubacterium__ventriosum_group          | Veg   | 3.52      | 0.02    | ns       |
| p__Proteobacteria.c__Gammaproteobacteria.o__Enterobacteriales.f__Enterobacteriaceae.g__Klebsiella         | Veg   | 3.49      | 0.04    | ns       |
| p__Firmicutes.c__Clostridia.o__Clostridiales.f__Lachnospiraceae.g__Roseburia.s__unidentified              | Veg   | 3.34      | 0.02    | ns       |
| p__Firmicutes.c__Bacilli.o__Lactobacillales.f__Lactobacillaceae.g__Lactobacillus.s__Lactobacillus_gasseri | Veg   | 3.26      | 0.04    | ns       |
| p__Firmicutes.c__Clostridia.o__Clostridiales.f__Ruminococcaceae.g__Ruminiclostridium_5                    | Omn   | 3.13      | 0.00    | ns       |
| k__Archaea.p__Nanoarchaeaeota.c__Nanohaloarchaeia                                                         | Omn   | 3.48      | 0.04    | ns       |
| k__Archaea.p__Nanoarchaeaeota.c__Nanohaloarchaeia.o__Deep_Sea_Euryarchaeotic_GroupDSEG                    | Omn   | 3.54      | 0.01    | ns       |
| p__Firmicutes.c__Negativicutes.o__Selenomonadales.f__Acidaminococcaceae                                   | Omn   | 3.94      | 0.01    | ns       |
| p__Firmicutes.c__Negativicutes.o__Selenomonadales.f__Acidaminococcaceae.g__Phascolarctobacterium          | Omn   | 3.96      | 0.03    | ns       |
| p__Bacteroidetes.c__Bacteroidia.o__Bacteroidales.f__Prevotellaceae.g__Prevotella_9                        | Omn   | 3.98      | 0.03    | ns       |
| p__Bacteroidetes.c__Bacteroidia.o__Bacteroidales.f__Prevotellaceae                                        | Omn   | 4.10      | 0.03    | ns       |
| p__Firmicutes.c__Negativicutes                                                                            | Omn   | 4.34      | 0.04    | ns       |
| p__Firmicutes.c__Negativicutes.o__Selenomonadales                                                         | Omn   | 4.34      | 0.04    | ns       |

The threshold on the logarithmic LDA score for discriminative features was set to 3.0.

Abbreviation: "p", phylum; "c", class; "o", order; "f", family; "g", genus; "veg", vegetarians; "omn" omnivores.

p < 0.05 are considered statistically significant.

\*ns: non-significant



Supplemental Table 7

|                        | Phylum | p_Actinobacteria     |             |         | Class | c_Woeseearchaeia     |                 |         | c_Coriobacteriia     |             |         |
|------------------------|--------|----------------------|-------------|---------|-------|----------------------|-----------------|---------|----------------------|-------------|---------|
|                        |        | Spearman Correlation | p value     | q value |       | Spearman Correlation | p value         | q value | Spearman Correlation | p value     | q value |
| Tryptophan             |        | 0.47                 | 0.07        | 0.47    |       | -0.65                | <b>0.01</b>     | 0.27    | 0.45                 | 0.08        | 0.26    |
| Histidine              |        | 0.38                 | 0.15        | 0.34    |       | -0.62                | <b>0.01</b>     | 0.17    | 0.40                 | 0.13        | 0.28    |
| Lysine                 |        | 0.39                 | 0.13        | 0.35    |       | -0.61                | <b>0.01</b>     | 0.16    | 0.39                 | 0.14        | 0.28    |
| Methionine             |        | 0.50                 | <b>0.05</b> | 0.51    |       | -0.64                | <b>0.01</b>     | 0.17    | 0.52                 | <b>0.04</b> | 0.20    |
| Lignoceric acid        |        | 0.02                 | 0.93        | 0.93    |       | 0.13                 | 0.64            | 0.85    | -0.03                | 0.92        | 0.98    |
| Docosahexaenoic Acid   |        | 0.37                 | 0.15        | 0.32    |       | -0.37                | 0.16            | 0.31    | 0.48                 | 0.06        | 0.25    |
| Clupanodonic acid      |        | 0.28                 | 0.29        | 0.48    |       | -0.34                | 0.19            | 0.35    | 0.43                 | 0.10        | 0.27    |
| Arachidonic acid       |        | 0.45                 | 0.08        | 0.42    |       | -0.40                | 0.12            | 0.29    | 0.55                 | <b>0.03</b> | 0.20    |
| Erucic acid            |        | 0.10                 | 0.72        | 0.80    |       | -0.12                | 0.66            | 0.84    | 0.16                 | 0.56        | 0.81    |
| Gadoleic acid          |        | 0.26                 | 0.32        | 0.48    |       | -0.43                | 0.10            | 0.25    | 0.39                 | 0.14        | 0.28    |
| Palmitic acid          |        | 0.40                 | 0.12        | 0.43    |       | -0.55                | <b>0.03</b>     | 0.17    | 0.46                 | 0.07        | 0.24    |
| Margaric acid          |        | 0.32                 | 0.22        | 0.39    |       | -0.56                | <b>0.02</b>     | 0.23    | 0.40                 | 0.12        | 0.28    |
| Pentadecanoic acid     |        | 0.23                 | 0.39        | 0.55    |       | -0.44                | 0.09            | 0.27    | 0.31                 | 0.24        | 0.41    |
| Cholesterol            |        | 0.53                 | <b>0.04</b> | 0.76    |       | -0.39                | 0.13            | 0.28    | 0.55                 | <b>0.03</b> | 0.22    |
| Cobalamin              |        | 0.39                 | 0.13        | 0.39    |       | -0.47                | 0.06            | 0.23    | 0.48                 | 0.06        | 0.25    |
| Niacin                 |        | 0.41                 | 0.11        | 0.48    |       | -0.67                | <b>&lt;0.01</b> | 0.40    | 0.43                 | 0.10        | 0.26    |
| Animal-derived Protein |        | 0.33                 | 0.21        | 0.40    |       | -0.48                | 0.06            | 0.26    | 0.43                 | 0.09        | 0.27    |
| Folic acid             |        | 0.11                 | 0.69        | 0.85    |       | -0.07                | 0.79            | 0.92    | -0.03                | 0.92        | 0.97    |
| Glucose                |        | -0.17                | 0.53        | 0.69    |       | 0.18                 | 0.51            | 0.74    | -0.21                | 0.43        | 0.68    |
| Plant-derived Protein  |        | 0.11                 | 0.69        | 0.80    |       | 0.10                 | 0.71            | 0.86    | -0.07                | 0.81        | 0.92    |
| Fiber                  |        | 0.07                 | 0.80        | 0.84    |       | 0.07                 | 0.80            | 0.92    | -0.14                | 0.62        | 0.86    |

Supplemental Table 7 (continued)

|                        | c_Bacteroidia        |                |                | c_Deltaproteobacteria |                |                | Order | o_Actinomycetales    |                |                |
|------------------------|----------------------|----------------|----------------|-----------------------|----------------|----------------|-------|----------------------|----------------|----------------|
|                        | Spearman Correlation | <i>p</i> value | <i>q</i> value | Spearman Correlation  | <i>p</i> value | <i>q</i> value |       | Spearman Correlation | <i>p</i> value | <i>q</i> value |
| Tryptophan             | -0.01                | 0.97           | 0.98           | 0.20                  | 0.46           | 0.72           |       | -0.08                | 0.78           | 1.00           |
| Histidine              | 0.13                 | 0.64           | 0.84           | 0.32                  | 0.23           | 0.41           |       | -0.21                | 0.44           | 1.00           |
| Lysine                 | -0.03                | 0.92           | 0.96           | 0.27                  | 0.31           | 0.52           |       | -0.14                | 0.60           | 1.00           |
| Methionine             | 0.04                 | 0.88           | 0.99           | 0.35                  | 0.18           | 0.34           |       | -0.21                | 0.44           | 1.00           |
| Lignoceric acid        | 0.04                 | 0.88           | 0.97           | -0.40                 | 0.13           | 0.28           |       | -0.05                | 0.85           | 0.98           |
| Docosahexaenoic Acid   | -0.11                | 0.69           | 0.85           | 0.52                  | <b>0.04</b>    | 0.19           |       | -0.24                | 0.38           | 1.00           |
| Clupanodonic acid      | -0.14                | 0.61           | 0.87           | 0.47                  | 0.06           | 0.24           |       | -0.40                | 0.12           | 0.89           |
| Arachidonic acid       | -0.13                | 0.63           | 0.85           | 0.46                  | 0.07           | 0.24           |       | -0.26                | 0.34           | 1.00           |
| Erucic acid            | 0.20                 | 0.46           | 0.71           | 0.42                  | 0.11           | 0.26           |       | -0.36                | 0.17           | 0.87           |
| Gadoleic acid          | -0.12                | 0.66           | 0.83           | 0.27                  | 0.31           | 0.52           |       | -0.44                | 0.09           | 0.90           |
| Palmitic acid          | 0.08                 | 0.76           | 0.91           | 0.47                  | 0.07           | 0.24           |       | -0.17                | 0.54           | 1.00           |
| Margaric acid          | 0.14                 | 0.62           | 0.85           | 0.57                  | <b>0.02</b>    | 0.22           |       | -0.22                | 0.40           | 1.00           |
| Pentadecanoic acid     | 0.50                 | <b>0.05</b>    | 0.23           | 0.55                  | <b>0.03</b>    | 0.18           |       | -0.07                | 0.79           | 1.00           |
| Cholesterol            | 0.02                 | 0.93           | 0.95           | 0.43                  | 0.10           | 0.25           |       | -0.17                | 0.54           | 1.00           |
| Cobalamin              | -0.03                | 0.91           | 1.00           | 0.59                  | <b>0.02</b>    | 0.18           |       | -0.23                | 0.38           | 1.00           |
| Niacin                 | -0.03                | 0.92           | 0.99           | 0.22                  | 0.42           | 0.67           |       | -0.07                | 0.79           | 1.00           |
| Animal-derived Protein | 0.19                 | 0.47           | 0.71           | 0.55                  | <b>0.03</b>    | 0.19           |       | -0.47                | 0.06           | 0.82           |
| Folic acid             | -0.08                | 0.77           | 0.91           | -0.36                 | 0.18           | 0.33           |       | 0.56                 | <b>0.02</b>    | 0.97           |
| Glucose                | 0.12                 | 0.65           | 0.84           | -0.35                 | 0.18           | 0.33           |       | 0.43                 | 0.10           | 0.84           |
| Plant-derived Protein  | -0.40                | 0.12           | 0.29           | -0.53                 | <b>0.03</b>    | 0.19           |       | 0.50                 | <b>0.05</b>    | 0.82           |
| Fiber                  | -0.01                | 0.97           | 0.97           | -0.65                 | <b>0.01</b>    | 0.18           |       | 0.29                 | 0.27           | 1.00           |

Supplemental Table 7 (continued)

|                        | o_Micrococcales      |                |                | o_Bacteroidales      |                |                | o_Bacillales         |                |                |
|------------------------|----------------------|----------------|----------------|----------------------|----------------|----------------|----------------------|----------------|----------------|
|                        | Spearman Correlation | <i>p</i> value | <i>q</i> value | Spearman Correlation | <i>p</i> value | <i>q</i> value | Spearman Correlation | <i>p</i> value | <i>q</i> value |
| Tryptophan             | -0.17                | 0.53           | 1.00           | 0.21                 | 0.42           | 1.00           | -0.13                | 0.63           | 1.00           |
| Histidine              | -0.12                | 0.66           | 1.00           | 0.20                 | 0.45           | 1.00           | -0.12                | 0.66           | 1.00           |
| Lysine                 | -0.14                | 0.60           | 1.00           | 0.14                 | 0.60           | 1.00           | -0.14                | 0.60           | 1.00           |
| Methionine             | -0.40                | 0.12           | 0.87           | 0.14                 | 0.59           | 1.00           | -0.18                | 0.51           | 1.00           |
| Lignoceric acid        | -0.01                | 0.97           | 0.99           | 0.48                 | 0.06           | 0.87           | 0.08                 | 0.75           | 1.00           |
| Docosahexaenoic Acid   | -0.55                | <b>0.03</b>    | 0.93           | -0.07                | 0.80           | 0.98           | -0.33                | 0.21           | 0.97           |
| Clupanodonic acid      | -0.44                | 0.09           | 0.85           | -0.06                | 0.82           | 0.98           | -0.38                | 0.15           | 0.86           |
| Arachidonic acid       | -0.58                | <b>0.02</b>    | 1.00           | -0.08                | 0.76           | 1.00           | -0.28                | 0.29           | 1.00           |
| Erucic acid            | 0.03                 | 0.91           | 0.99           | 0.13                 | 0.63           | 1.00           | -0.59                | <b>0.02</b>    | 1.00           |
| Gadoleic acid          | -0.42                | 0.11           | 0.88           | 0.28                 | 0.29           | 1.00           | -0.29                | 0.27           | 1.00           |
| Palmitic acid          | -0.11                | 0.69           | 1.00           | -0.14                | 0.59           | 1.00           | -0.20                | 0.47           | 1.00           |
| Margaric acid          | -0.10                | 0.72           | 1.00           | 0.08                 | 0.76           | 1.00           | -0.23                | 0.39           | 1.00           |
| Pentadecanoic acid     | 0.08                 | 0.78           | 1.00           | 0.05                 | 0.86           | 0.98           | -0.18                | 0.51           | 1.00           |
| Cholesterol            | -0.53                | <b>0.03</b>    | 0.94           | -0.10                | 0.72           | 1.00           | -0.25                | 0.35           | 1.00           |
| Cobalamin              | -0.50                | <b>0.05</b>    | 0.90           | -0.19                | 0.49           | 1.00           | -0.30                | 0.26           | 1.00           |
| Niacin                 | 0.02                 | 0.94           | 0.98           | -0.08                | 0.76           | 1.00           | <b>&lt;0.01</b>      | 0.99           | 1.00           |
| Animal-derived Protein | -0.40                | 0.12           | 0.84           | -0.12                | 0.66           | 1.00           | -0.22                | 0.41           | 1.00           |
| Folic acid             | 0.53                 | <b>0.04</b>    | 0.84           | 0.15                 | 0.58           | 1.00           | 0.27                 | 0.32           | 1.00           |
| Glucose                | 0.19                 | 0.49           | 1.00           | -0.04                | 0.88           | 0.99           | 0.66                 | <b>0.01</b>    | 0.92           |
| Plant-derived Protein  | 0.14                 | 0.60           | 1.00           | 0.40                 | 0.12           | 0.81           | 0.16                 | 0.55           | 1.00           |
| Fiber                  | 0.38                 | 0.15           | 0.84           | 0.30                 | 0.26           | 1.00           | 0.43                 | 0.10           | 0.80           |

Supplemental Table 7 (continued)

|                        | o_Lactobacillales    |                |                | o_Rickettsiales      |                |                | o_Desulfovibrionales |                |                |
|------------------------|----------------------|----------------|----------------|----------------------|----------------|----------------|----------------------|----------------|----------------|
|                        | Spearman Correlation | <i>p</i> value | <i>q</i> value | Spearman Correlation | <i>p</i> value | <i>q</i> value | Spearman Correlation | <i>p</i> value | <i>q</i> value |
| Tryptophan             | 0.07                 | 0.79           | 1.00           | 0.04                 | 0.88           | 0.98           | -0.06                | 0.82           | 0.99           |
| Histidine              | -0.12                | 0.66           | 1.00           | 0.15                 | 0.58           | 1.00           | -0.17                | 0.53           | 1.00           |
| Lysine                 | -0.05                | 0.86           | 0.99           | 0.09                 | 0.75           | 1.00           | -0.10                | 0.73           | 1.00           |
| Methionine             | 0.03                 | 0.92           | 0.98           | 0.02                 | 0.94           | 0.97           | -0.19                | 0.48           | 1.00           |
| Lignoceric acid        | -0.46                | 0.08           | 0.85           | 0.03                 | 0.91           | 0.98           | 0.35                 | 0.19           | 0.91           |
| Docosahexaenoic Acid   | 0.18                 | 0.50           | 1.00           | -0.10                | 0.72           | 1.00           | -0.27                | 0.32           | 1.00           |
| Clupanodonic acid      | 0.28                 | 0.30           | 1.00           | -0.12                | 0.66           | 1.00           | -0.50                | <b>0.05</b>    | 0.98           |
| Arachidonic acid       | 0.14                 | 0.62           | 1.00           | -0.04                | 0.88           | 0.99           | -0.28                | 0.30           | 1.00           |
| Erucic acid            | -0.09                | 0.74           | 1.00           | 0.39                 | 0.14           | 0.82           | -0.19                | 0.48           | 1.00           |
| Gadoleic acid          | -0.06                | 0.82           | 0.98           | 0.07                 | 0.80           | 0.99           | -0.26                | 0.32           | 1.00           |
| Palmitic acid          | 0.24                 | 0.37           | 1.00           | 0.09                 | 0.74           | 1.00           | -0.33                | 0.22           | 0.98           |
| Margaric acid          | 0.07                 | 0.80           | 0.99           | -0.12                | 0.66           | 1.00           | -0.44                | 0.09           | 0.84           |
| Pentadecanoic acid     | 0.04                 | 0.89           | 0.98           | 0.06                 | 0.83           | 0.98           | -0.47                | 0.06           | 0.77           |
| Cholesterol            | 0.11                 | 0.67           | 1.00           | -0.02                | 0.93           | 0.98           | -0.19                | 0.48           | 1.00           |
| Cobalamin              | 0.10                 | 0.70           | 1.00           | -0.07                | 0.80           | 0.99           | -0.36                | 0.18           | 0.88           |
| Niacin                 | 0.12                 | 0.66           | 1.00           | 0.13                 | 0.64           | 1.00           | -0.12                | 0.67           | 1.00           |
| Animal-derived Protein | -0.03                | 0.91           | 0.99           | 0.15                 | 0.58           | 1.00           | -0.40                | 0.13           | 0.78           |
| Folic acid             | -0.05                | 0.86           | 0.99           | <b>&lt;0.01</b>      | 0.99           | 0.99           | 0.24                 | 0.37           | 1.00           |
| Glucose                | 0.03                 | 0.93           | 0.98           | -0.03                | 0.91           | 0.98           | 0.36                 | 0.17           | 0.87           |
| Plant-derived Protein  | 0.06                 | 0.82           | 0.98           | -0.38                | 0.15           | 0.81           | 0.48                 | 0.06           | 0.92           |
| Fiber                  | -0.17                | 0.52           | 1.00           | -0.01                | 0.96           | 0.98           | 0.41                 | 0.11           | 0.87           |

Supplemental Table 7 (continued)

|                        | o_Pasteurellales     |                |                | Family | f_Actinomycetaceae   |                 |                | f_Coriobacteriaceae  |                |                     |
|------------------------|----------------------|----------------|----------------|--------|----------------------|-----------------|----------------|----------------------|----------------|---------------------|
|                        | Spearman Correlation | <i>p</i> value | <i>q</i> value |        | Spearman Correlation | <i>p</i> value  | <i>q</i> value | Spearman Correlation | <i>p</i> value | Adj. <i>p</i> value |
| Tryptophan             | 0.11                 | 0.69           | 1.00           |        | 0.67                 | <b>&lt;0.01</b> | 0.19           | 0.34                 | 0.20           | 0.59                |
| Histidine              | 0.10                 | 0.72           | 1.00           |        | 0.66                 | <b>0.01</b>     | 0.14           | 0.26                 | 0.33           | 0.68                |
| Lysine                 | 0.16                 | 0.55           | 1.00           |        | 0.66                 | <b>0.01</b>     | 0.13           | 0.26                 | 0.33           | 0.68                |
| Methionine             | 0.01                 | 0.98           | 0.99           |        | 0.80                 | <b>&lt;0.01</b> | <b>0.05</b>    | 0.40                 | 0.12           | 0.52                |
| Lignoceric acid        | -0.13                | 0.64           | 1.00           |        | 0.03                 | 0.91            | 0.99           | -0.04                | 0.88           | 0.99                |
| Docosahexaenoic Acid   | 0.23                 | 0.39           | 1.00           |        | 0.65                 | <b>0.01</b>     | 0.13           | 0.41                 | 0.12           | 0.51                |
| Clupanodonic acid      | 0.23                 | 0.39           | 1.00           |        | 0.62                 | <b>0.01</b>     | 0.17           | 0.29                 | 0.28           | 0.67                |
| Arachidonic acid       | 0.16                 | 0.56           | 1.00           |        | 0.68                 | <b>&lt;0.01</b> | 0.27           | 0.43                 | 0.09           | 0.48                |
| Erucic acid            | 0.33                 | 0.22           | 0.97           |        | 0.26                 | 0.33            | 0.68           | 0.10                 | 0.72           | 0.90                |
| Gadoleic acid          | 0.29                 | 0.28           | 1.00           |        | 0.67                 | <b>&lt;0.01</b> | 0.19           | 0.22                 | 0.41           | 0.74                |
| Palmitic acid          | 0.17                 | 0.54           | 1.00           |        | 0.53                 | <b>0.04</b>     | 0.26           | 0.41                 | 0.11           | 0.51                |
| Margaric acid          | 0.20                 | 0.47           | 1.00           |        | 0.60                 | <b>0.01</b>     | 0.18           | 0.38                 | 0.15           | 0.54                |
| Pentadecanoic acid     | -0.21                | 0.43           | 1.00           |        | 0.51                 | <b>0.04</b>     | 0.28           | 0.27                 | 0.30           | 0.68                |
| Cholesterol            | -0.06                | 0.84           | 0.97           |        | 0.66                 | <b>0.01</b>     | 0.15           | 0.50                 | <b>0.05</b>    | 0.30                |
| Cobalamin              | -0.03                | 0.91           | 1.00           |        | 0.76                 | <b>&lt;0.01</b> | 0.07           | 0.28                 | 0.30           | 0.68                |
| Niacin                 | 0.12                 | 0.66           | 1.00           |        | 0.53                 | <b>0.04</b>     | 0.27           | 0.29                 | 0.27           | 0.67                |
| Animal-derived Protein | -0.02                | 0.93           | 0.97           |        | 0.68                 | <b>&lt;0.01</b> | 0.23           | 0.24                 | 0.36           | 0.71                |
| Folic acid             | -0.07                | 0.79           | 1.00           |        | -0.18                | 0.51            | 0.78           | 0.10                 | 0.70           | 0.89                |
| Glucose                | -0.24                | 0.38           | 1.00           |        | -0.43                | 0.10            | 0.48           | 0.01                 | 0.97           | 1.00                |
| Plant-derived Protein  | 0.16                 | 0.56           | 1.00           |        | -0.19                | 0.47            | 0.76           | 0.13                 | 0.64           | 0.86                |
| Fiber                  | -0.17                | 0.53           | 1.00           |        | -0.37                | 0.16            | 0.56           | 0.03                 | 0.91           | 0.99                |

Supplemental Table 7 (continued)

|                        | f_Eggerthellaceae    |                |                | f_Bacteroidaceae     |                |                | f_Tannerellaceae     |                |                |
|------------------------|----------------------|----------------|----------------|----------------------|----------------|----------------|----------------------|----------------|----------------|
|                        | Spearman Correlation | <i>p</i> value | <i>q</i> value | Spearman Correlation | <i>p</i> value | <i>q</i> value | Spearman Correlation | <i>p</i> value | <i>q</i> value |
| Tryptophan             | 0.40                 | 0.12           | 0.53           | -0.04                | 0.89           | 0.99           | <b>&lt;0.01</b>      | 0.99           | 1.00           |
| Histidine              | 0.46                 | 0.07           | 0.41           | 0.06                 | 0.82           | 0.94           | 0.06                 | 0.82           | 0.95           |
| Lysine                 | 0.40                 | 0.13           | 0.51           | -0.08                | 0.78           | 0.93           | -0.01                | 0.97           | 1.00           |
| Methionine             | 0.57                 | <b>0.02</b>    | 0.25           | -0.04                | 0.88           | 0.98           | 0.09                 | 0.74           | 0.91           |
| Lignoceric acid        | 0.10                 | 0.71           | 0.90           | 0.13                 | 0.64           | 0.87           | -0.07                | 0.79           | 0.93           |
| Docosahexaenoic Acid   | 0.42                 | 0.11           | 0.51           | -0.19                | 0.47           | 0.76           | 0.04                 | 0.88           | 0.99           |
| Clupanodonic acid      | 0.36                 | 0.17           | 0.57           | -0.23                | 0.40           | 0.75           | 0.02                 | 0.94           | 1.00           |
| Arachidonic acid       | 0.52                 | <b>0.04</b>    | 0.28           | -0.23                | 0.40           | 0.74           | -0.02                | 0.95           | 1.00           |
| Erucic acid            | -0.01                | 0.97           | 1.00           | 0.18                 | 0.51           | 0.78           | 0.07                 | 0.79           | 0.93           |
| Gadoleic acid          | 0.39                 | 0.13           | 0.52           | -0.21                | 0.44           | 0.76           | -0.12                | 0.66           | 0.88           |
| Palmitic acid          | 0.33                 | 0.21           | 0.59           | -0.04                | 0.89           | 0.98           | 0.27                 | 0.31           | 0.67           |
| Margaric acid          | 0.44                 | 0.09           | 0.48           | 0.01                 | 0.97           | 1.00           | 0.23                 | 0.39           | 0.75           |
| Pentadecanoic acid     | 0.37                 | 0.15           | 0.55           | 0.40                 | 0.13           | 0.52           | 0.54                 | <b>0.03</b>    | 0.26           |
| Cholesterol            | 0.54                 | <b>0.03</b>    | 0.27           | -0.07                | 0.80           | 0.93           | 0.19                 | 0.49           | 0.78           |
| Cobalamin              | 0.56                 | <b>0.02</b>    | 0.24           | -0.09                | 0.75           | 0.92           | -0.02                | 0.94           | 1.00           |
| Niacin                 | 0.35                 | 0.19           | 0.59           | -0.09                | 0.73           | 0.91           | 0.07                 | 0.79           | 0.94           |
| Animal-derived Protein | 0.55                 | <b>0.03</b>    | 0.26           | 0.09                 | 0.75           | 0.92           | 0.18                 | 0.50           | 0.78           |
| Folic acid             | -0.11                | 0.68           | 0.89           | -0.08                | 0.77           | 0.93           | 0.03                 | 0.90           | 0.99           |
| Glucose                | -0.16                | 0.56           | 0.82           | 0.08                 | 0.76           | 0.92           | 0.34                 | 0.20           | 0.59           |
| Plant-derived Protein  | -0.18                | 0.52           | 0.78           | -0.28                | 0.29           | 0.68           | -0.31                | 0.25           | 0.63           |
| Fiber                  | -0.10                | 0.70           | 0.90           | 0.02                 | 0.93           | 1.00           | <b>&lt;0.01</b>      | 0.99           | 0.99           |

Supplemental Table 7 (continued)

|                        | f_Lactobacillaceae   |                |                | f_Clostridiaceae_1   |                |                | f_Lachnospiraceae    |                |                |
|------------------------|----------------------|----------------|----------------|----------------------|----------------|----------------|----------------------|----------------|----------------|
|                        | Spearman Correlation | <i>p</i> value | <i>q</i> value | Spearman Correlation | <i>p</i> value | <i>q</i> value | Spearman Correlation | <i>p</i> value | <i>q</i> value |
| Tryptophan             | 0.29                 | 0.27           | 0.67           | 0.20                 | 0.47           | 0.76           | 0.33                 | 0.21           | 0.59           |
| Histidine              | 0.28                 | 0.29           | 0.67           | 0.18                 | 0.52           | 0.77           | 0.29                 | 0.27           | 0.66           |
| Lysine                 | 0.29                 | 0.28           | 0.67           | 0.21                 | 0.44           | 0.76           | 0.31                 | 0.24           | 0.63           |
| Methionine             | 0.37                 | 0.16           | 0.56           | 0.34                 | 0.20           | 0.59           | 0.23                 | 0.40           | 0.74           |
| Lignoceric acid        | 0.15                 | 0.59           | 0.85           | -0.05                | 0.86           | 0.98           | 0.09                 | 0.74           | 0.92           |
| Docosahexaenoic Acid   | 0.26                 | 0.34           | 0.68           | 0.23                 | 0.40           | 0.73           | 0.03                 | 0.92           | 0.99           |
| Clupanodonic acid      | 0.11                 | 0.69           | 0.90           | 0.15                 | 0.58           | 0.84           | <b>&lt;0.01</b>      | 1.00           | 1.00           |
| Arachidonic acid       | 0.34                 | 0.20           | 0.60           | 0.32                 | 0.23           | 0.62           | 0.11                 | 0.67           | 0.89           |
| Erucic acid            | -0.18                | 0.50           | 0.78           | -0.05                | 0.87           | 0.98           | 0.02                 | 0.95           | 0.99           |
| Gadoleic acid          | 0.20                 | 0.45           | 0.76           | 0.14                 | 0.60           | 0.85           | 0.11                 | 0.67           | 0.88           |
| Palmitic acid          | 0.11                 | 0.69           | 0.90           | 0.25                 | 0.35           | 0.70           | 0.20                 | 0.45           | 0.75           |
| Margaric acid          | 0.23                 | 0.38           | 0.74           | 0.18                 | 0.50           | 0.78           | 0.02                 | 0.94           | 1.00           |
| Pentadecanoic acid     | 0.21                 | 0.43           | 0.76           | 0.27                 | 0.30           | 0.67           | -0.01                | 0.97           | 0.99           |
| Cholesterol            | 0.35                 | 0.19           | 0.59           | 0.42                 | 0.11           | 0.50           | 0.09                 | 0.74           | 0.91           |
| Cobalamin              | 0.38                 | 0.15           | 0.55           | 0.37                 | 0.16           | 0.55           | 0.13                 | 0.64           | 0.87           |
| Niacin                 | 0.20                 | 0.45           | 0.75           | 0.28                 | 0.30           | 0.68           | 0.46                 | 0.07           | 0.40           |
| Animal-derived Protein | 0.13                 | 0.64           | 0.87           | 0.24                 | 0.37           | 0.73           | 0.16                 | 0.56           | 0.82           |
| Folic acid             | 0.33                 | 0.21           | 0.59           | 0.21                 | 0.44           | 0.76           | 0.16                 | 0.56           | 0.81           |
| Glucose                | 0.07                 | 0.79           | 0.93           | -0.07                | 0.80           | 0.93           | -0.03                | 0.91           | 0.99           |
| Plant-derived Protein  | 0.26                 | 0.33           | 0.69           | -0.14                | 0.60           | 0.86           | 0.01                 | 0.98           | 1.00           |
| Fiber                  | 0.03                 | 0.90           | 0.99           | -0.06                | 0.82           | 0.94           | 0.14                 | 0.61           | 0.85           |

Supplemental Table 7 (continued)

|                        | f_Peptostreptococcaceae |                |                | f_Acidaminococcaceae |                |                | f_Desulfovibrionaceae |                |                |
|------------------------|-------------------------|----------------|----------------|----------------------|----------------|----------------|-----------------------|----------------|----------------|
|                        | Spearman Correlation    | <i>p</i> value | <i>q</i> value | Spearman Correlation | <i>p</i> value | <i>q</i> value | Spearman Correlation  | <i>p</i> value | <i>q</i> value |
| Tryptophan             | 0.61                    | <b>0.01</b>    | 0.18           | 0.13                 | 0.62           | 0.86           | 0.20                  | 0.46           | 0.76           |
| Histidine              | 0.58                    | <b>0.02</b>    | 0.23           | 0.27                 | 0.31           | 0.68           | 0.32                  | 0.23           | 0.62           |
| Lysine                 | 0.60                    | <b>0.01</b>    | 0.19           | 0.16                 | 0.56           | 0.82           | 0.27                  | 0.31           | 0.68           |
| Methionine             | 0.53                    | <b>0.03</b>    | 0.26           | 0.20                 | 0.45           | 0.76           | 0.35                  | 0.18           | 0.60           |
| Lignoceric acid        | 0.20                    | 0.46           | 0.75           | -0.23                | 0.40           | 0.76           | -0.40                 | 0.13           | 0.53           |
| Docosahexaenoic Acid   | 0.25                    | 0.35           | 0.70           | 0.18                 | 0.51           | 0.77           | 0.52                  | <b>0.04</b>    | 0.27           |
| Clupanodonic acid      | 0.14                    | 0.60           | 0.85           | 0.23                 | 0.40           | 0.75           | 0.47                  | 0.06           | 0.37           |
| Arachidonic acid       | 0.31                    | 0.24           | 0.63           | 0.13                 | 0.62           | 0.86           | 0.46                  | 0.07           | 0.39           |
| Erucic acid            | 0.22                    | 0.42           | 0.74           | 0.50                 | <b>0.05</b>    | 0.31           | 0.42                  | 0.11           | 0.51           |
| Gadoleic acid          | 0.39                    | 0.14           | 0.52           | 0.12                 | 0.66           | 0.88           | 0.27                  | 0.31           | 0.68           |
| Palmitic acid          | 0.40                    | 0.12           | 0.53           | 0.39                 | 0.14           | 0.51           | 0.47                  | 0.07           | 0.40           |
| Margaric acid          | 0.29                    | 0.27           | 0.67           | 0.33                 | 0.22           | 0.60           | 0.57                  | <b>0.02</b>    | 0.24           |
| Pentadecanoic acid     | 0.28                    | 0.30           | 0.68           | 0.53                 | <b>0.03</b>    | 0.28           | 0.55                  | <b>0.03</b>    | 0.27           |
| Cholesterol            | 0.32                    | 0.22           | 0.61           | 0.21                 | 0.43           | 0.76           | 0.43                  | 0.10           | 0.48           |
| Cobalamin              | 0.30                    | 0.26           | 0.67           | 0.22                 | 0.40           | 0.74           | 0.59                  | <b>0.02</b>    | 0.20           |
| Niacin                 | 0.63                    | <b>0.01</b>    | 0.16           | 0.19                 | 0.49           | 0.78           | 0.22                  | 0.42           | 0.75           |
| Animal-derived Protein | 0.27                    | 0.31           | 0.67           | 0.48                 | 0.06           | 0.35           | 0.55                  | <b>0.03</b>    | 0.27           |
| Folic acid             | 0.39                    | 0.14           | 0.52           | -0.34                | 0.19           | 0.59           | -0.36                 | 0.18           | 0.58           |
| Glucose                | -0.01                   | 0.96           | 1.00           | -0.17                | 0.54           | 0.80           | -0.35                 | 0.18           | 0.59           |
| Plant-derived Protein  | 0.14                    | 0.61           | 0.85           | -0.66                | <b>0.01</b>    | 0.17           | -0.53                 | <b>0.03</b>    | 0.27           |
| Fiber                  | 0.10                    | 0.72           | 0.90           | -0.34                | 0.20           | 0.59           | -0.65                 | <b>0.01</b>    | 0.14           |



Supplemental Table 7 (continued)

| Genus                  | g_Actinomyces        |                 |                | g_Collinsella        |                |                | g_Raoultibacter      |                |                |
|------------------------|----------------------|-----------------|----------------|----------------------|----------------|----------------|----------------------|----------------|----------------|
|                        | Spearman Correlation | <i>p</i> value  | <i>q</i> value | Spearman Correlation | <i>p</i> value | <i>q</i> value | Spearman Correlation | <i>p</i> value | <i>q</i> value |
| Tryptophan             | 0.64                 | <b>0.01</b>     | 0.33           | 0.34                 | 0.20           | 0.63           | 0.46                 | 0.07           | 0.49           |
| Histidine              | 0.65                 | <b>0.01</b>     | 0.34           | 0.26                 | 0.33           | 0.74           | 0.51                 | <b>0.04</b>    | 0.45           |
| Lysine                 | 0.64                 | <b>0.01</b>     | 0.30           | 0.26                 | 0.33           | 0.74           | 0.57                 | <b>0.02</b>    | 0.37           |
| Methionine             | 0.78                 | <b>&lt;0.01</b> | 0.21           | 0.40                 | 0.12           | 0.57           | 0.50                 | <b>0.05</b>    | 0.46           |
| Lignoceric acid        | 0.06                 | 0.83            | 0.98           | -0.04                | 0.88           | 0.99           | -0.01                | 0.97           | 0.99           |
| Docosahexaenoic Acid   | 0.61                 | <b>0.01</b>     | 0.29           | 0.41                 | 0.12           | 0.56           | 0.33                 | 0.22           | 0.65           |
| Clupanodonic acid      | 0.58                 | <b>0.02</b>     | 0.36           | 0.29                 | 0.28           | 0.70           | 0.22                 | 0.42           | 0.83           |
| Arachidonic acid       | 0.65                 | <b>0.01</b>     | 0.41           | 0.43                 | 0.09           | 0.53           | 0.39                 | 0.13           | 0.56           |
| Erucic acid            | 0.21                 | 0.43            | 0.83           | 0.10                 | 0.72           | 0.96           | 0.38                 | 0.15           | 0.57           |
| Gadoleic acid          | 0.65                 | <b>0.01</b>     | 0.41           | 0.22                 | 0.41           | 0.82           | 0.32                 | 0.22           | 0.65           |
| Palmitic acid          | 0.49                 | 0.05            | 0.46           | 0.41                 | 0.11           | 0.55           | 0.46                 | 0.07           | 0.50           |
| Margaric acid          | 0.60                 | <b>0.01</b>     | 0.34           | 0.38                 | 0.15           | 0.57           | 0.43                 | 0.10           | 0.52           |
| Pentadecanoic acid     | 0.53                 | <b>0.03</b>     | 0.44           | 0.27                 | 0.30           | 0.72           | 0.32                 | 0.23           | 0.66           |
| Cholesterol            | 0.64                 | <b>0.01</b>     | 0.31           | 0.50                 | <b>0.05</b>    | 0.45           | 0.47                 | 0.06           | 0.48           |
| Cobalamin              | 0.74                 | <b>&lt;0.01</b> | 0.17           | 0.28                 | 0.30           | 0.71           | 0.46                 | 0.08           | 0.50           |
| Niacin                 | 0.49                 | 0.05            | 0.45           | 0.29                 | 0.27           | 0.67           | 0.50                 | 0.05           | 0.45           |
| Animal-derived Protein | 0.66                 | <b>&lt;0.01</b> | 0.45           | 0.24                 | 0.36           | 0.78           | 0.40                 | 0.13           | 0.56           |
| Folic acid             | -0.16                | 0.56            | 0.90           | 0.10                 | 0.70           | 0.96           | 0.31                 | 0.25           | 0.67           |
| Glucose                | -0.41                | 0.12            | 0.56           | 0.01                 | 0.97           | 0.99           | -0.45                | 0.08           | 0.51           |
| Plant-derived Protein  | -0.18                | 0.49            | 0.85           | 0.13                 | 0.64           | 0.94           | -0.07                | 0.78           | 0.98           |
| Fiber                  | -0.34                | 0.20            | 0.63           | 0.03                 | 0.91           | 0.99           | -0.04                | 0.89           | 0.98           |

Supplemental Table 7 (continued)

g\_Eggerthella

g\_Bacteroides

g\_Parabacteroides

|                        | Spearman Correlation | <i>p</i> value | <i>q</i> value | Spearman Correlation | <i>p</i> value | <i>q</i> value | Spearman Correlation | <i>p</i> value | <i>q</i> value |
|------------------------|----------------------|----------------|----------------|----------------------|----------------|----------------|----------------------|----------------|----------------|
| Tryptophan             | 0.27                 | 0.31           | 0.73           | -0.04                | 0.89           | 0.98           | <b>&lt;0.01</b>      | 0.99           | 1.00           |
| Histidine              | 0.27                 | 0.31           | 0.72           | 0.06                 | 0.82           | 0.98           | 0.06                 | 0.82           | 0.98           |
| Lysine                 | 0.24                 | 0.38           | 0.79           | -0.08                | 0.78           | 0.98           | -0.01                | 0.97           | 0.99           |
| Methionine             | 0.19                 | 0.48           | 0.85           | -0.04                | 0.88           | 0.98           | 0.09                 | 0.74           | 0.97           |
| Lignoceric acid        | 0.40                 | 0.13           | 0.57           | 0.13                 | 0.64           | 0.93           | -0.07                | 0.79           | 0.97           |
| Docosahexaenoic Acid   | -0.05                | 0.85           | 0.98           | -0.19                | 0.47           | 0.85           | 0.04                 | 0.88           | 0.99           |
| Clupanodonic acid      | -0.16                | 0.55           | 0.90           | -0.23                | 0.40           | 0.81           | 0.02                 | 0.94           | 0.99           |
| Arachidonic acid       | 0.03                 | 0.92           | 0.98           | -0.23                | 0.40           | 0.81           | -0.02                | 0.95           | 0.99           |
| Erucic acid            | -0.16                | 0.57           | 0.90           | 0.18                 | 0.51           | 0.86           | 0.07                 | 0.79           | 0.97           |
| Gadoleic acid          | 0.07                 | 0.80           | 0.97           | -0.21                | 0.44           | 0.83           | -0.12                | 0.66           | 0.94           |
| Palmitic acid          | -0.12                | 0.66           | 0.94           | -0.04                | 0.89           | 0.98           | 0.27                 | 0.31           | 0.73           |
| Margaric acid          | -0.01                | 0.97           | 0.99           | 0.01                 | 0.97           | 0.99           | 0.23                 | 0.39           | 0.81           |
| Pentadecanoic acid     | 0.04                 | 0.89           | 0.98           | 0.40                 | 0.13           | 0.56           | 0.54                 | <b>0.03</b>    | 0.44           |
| Cholesterol            | 0.01                 | 0.97           | 0.99           | -0.07                | 0.80           | 0.97           | 0.19                 | 0.49           | 0.86           |
| Cobalamin              | 0.08                 | 0.78           | 0.98           | -0.09                | 0.75           | 0.97           | -0.02                | 0.94           | 0.99           |
| Niacin                 | 0.11                 | 0.70           | 0.96           | -0.09                | 0.73           | 0.97           | 0.07                 | 0.79           | 0.97           |
| Animal-derived Protein | -0.02                | 0.94           | 0.99           | 0.09                 | 0.75           | 0.97           | 0.18                 | 0.50           | 0.86           |
| Folic acid             | 0.27                 | 0.31           | 0.72           | -0.08                | 0.77           | 0.97           | 0.03                 | 0.90           | 0.98           |
| Glucose                | -0.06                | 0.83           | 0.98           | 0.08                 | 0.76           | 0.97           | 0.34                 | 0.20           | 0.63           |
| Plant-derived Protein  | 0.35                 | 0.19           | 0.63           | -0.28                | 0.29           | 0.70           | -0.31                | 0.25           | 0.67           |
| Fiber                  | 0.26                 | 0.34           | 0.75           | 0.02                 | 0.93           | 0.99           | <b>&lt;0.01</b>      | 0.99           | 1.00           |

Supplemental Table 7 (continued)

|                        | g_Gemella            |                |                | g_Clostridium_sensu_stricto_1 |                |                | g_Family_XIII_AD3011_group |                |                |
|------------------------|----------------------|----------------|----------------|-------------------------------|----------------|----------------|----------------------------|----------------|----------------|
|                        | Spearman Correlation | <i>p</i> value | <i>q</i> value | Spearman Correlation          | <i>p</i> value | <i>q</i> value | Spearman Correlation       | <i>p</i> value | <i>q</i> value |
| Tryptophan             | 0.43                 | 0.09           | 0.53           | 0.20                          | 0.47           | 0.85           | 0.10                       | 0.71           | 0.96           |
| Histidine              | 0.45                 | 0.08           | 0.50           | 0.18                          | 0.52           | 0.87           | 0.09                       | 0.74           | 0.97           |
| Lysine                 | 0.43                 | 0.09           | 0.53           | 0.21                          | 0.44           | 0.83           | 0.08                       | 0.77           | 0.98           |
| Methionine             | 0.39                 | 0.14           | 0.56           | 0.34                          | 0.20           | 0.63           | 0.09                       | 0.75           | 0.97           |
| Lignoceric acid        | 0.21                 | 0.44           | 0.83           | -0.05                         | 0.86           | 0.98           | -0.03                      | 0.91           | 0.99           |
| Docosahexaenoic Acid   | 0.22                 | 0.42           | 0.83           | 0.23                          | 0.40           | 0.81           | 0.12                       | 0.67           | 0.94           |
| Clupanodonic acid      | 0.15                 | 0.57           | 0.90           | 0.15                          | 0.58           | 0.91           | 0.24                       | 0.38           | 0.79           |
| Arachidonic acid       | 0.30                 | 0.26           | 0.66           | 0.32                          | 0.23           | 0.66           | 0.17                       | 0.53           | 0.88           |
| Erucic acid            | 0.49                 | 0.05           | 0.46           | -0.05                         | 0.87           | 0.98           | 0.04                       | 0.89           | 0.98           |
| Gadoleic acid          | 0.30                 | 0.26           | 0.66           | 0.14                          | 0.60           | 0.91           | 0.13                       | 0.62           | 0.92           |
| Palmitic acid          | 0.27                 | 0.31           | 0.72           | 0.25                          | 0.35           | 0.77           | 0.22                       | 0.40           | 0.81           |
| Margaric acid          | 0.26                 | 0.32           | 0.74           | 0.18                          | 0.50           | 0.86           | 0.07                       | 0.79           | 0.97           |
| Pentadecanoic acid     | 0.12                 | 0.66           | 0.94           | 0.27                          | 0.30           | 0.72           | -0.06                      | 0.82           | 0.98           |
| Cholesterol            | 0.34                 | 0.20           | 0.62           | 0.42                          | 0.11           | 0.55           | 0.10                       | 0.72           | 0.96           |
| Cobalamin              | 0.32                 | 0.23           | 0.66           | 0.37                          | 0.16           | 0.59           | 0.13                       | 0.63           | 0.93           |
| Niacin                 | 0.35                 | 0.19           | 0.63           | 0.28                          | 0.30           | 0.71           | 0.34                       | 0.20           | 0.63           |
| Animal-derived Protein | 0.31                 | 0.24           | 0.66           | 0.24                          | 0.37           | 0.79           | 0.24                       | 0.37           | 0.79           |
| Folic acid             | 0.09                 | 0.74           | 0.97           | 0.21                          | 0.44           | 0.83           | -0.21                      | 0.44           | 0.83           |
| Glucose                | -0.55                | <b>0.03</b>    | 0.42           | -0.07                         | 0.80           | 0.97           | 0.03                       | 0.91           | 0.99           |
| Plant-derived Protein  | 0.07                 | 0.81           | 0.97           | -0.14                         | 0.60           | 0.91           | -0.21                      | 0.44           | 0.83           |
| Fiber                  | 0.08                 | 0.77           | 0.97           | -0.06                         | 0.82           | 0.98           | -0.06                      | 0.83           | 0.98           |

Supplemental Table 7 (continued)

|                        | g_[Eubacterium]_eligens_group |                |                | g_[Eubacterium]_ventriosum_group |                |                | g_Anaerostipes       |                |                |
|------------------------|-------------------------------|----------------|----------------|----------------------------------|----------------|----------------|----------------------|----------------|----------------|
|                        | Spearman Correlation          | <i>p</i> value | <i>q</i> value | Spearman Correlation             | <i>p</i> value | <i>q</i> value | Spearman Correlation | <i>p</i> value | <i>q</i> value |
| Tryptophan             | 0.42                          | 0.10           | 0.53           | 0.13                             | 0.63           | 0.93           | 0.45                 | 0.08           | 0.50           |
| Histidine              | 0.35                          | 0.19           | 0.63           | 0.08                             | 0.76           | 0.97           | 0.33                 | 0.22           | 0.65           |
| Lysine                 | 0.35                          | 0.19           | 0.63           | -0.05                            | 0.85           | 0.98           | 0.31                 | 0.25           | 0.66           |
| Methionine             | 0.20                          | 0.46           | 0.84           | -0.04                            | 0.89           | 0.98           | 0.22                 | 0.42           | 0.83           |
| Lignoceric acid        | 0.52                          | <b>0.04</b>    | 0.44           | 0.48                             | 0.06           | 0.46           | 0.40                 | 0.12           | 0.57           |
| Docosahexaenoic Acid   | -0.18                         | 0.50           | 0.86           | -0.34                            | 0.20           | 0.63           | -0.17                | 0.53           | 0.88           |
| Clupanodonic acid      | -0.15                         | 0.57           | 0.91           | -0.26                            | 0.34           | 0.75           | -0.11                | 0.68           | 0.95           |
| Arachidonic acid       | -0.21                         | 0.43           | 0.83           | -0.30                            | 0.27           | 0.67           | -0.11                | 0.69           | 0.96           |
| Erucic acid            | 0.03                          | 0.91           | 0.98           | -0.20                            | 0.45           | 0.83           | 0.09                 | 0.75           | 0.97           |
| Gadoleic acid          | 0.09                          | 0.75           | 0.97           | -0.02                            | 0.94           | 0.99           | 0.14                 | 0.61           | 0.92           |
| Palmitic acid          | 0.07                          | 0.78           | 0.98           | -0.22                            | 0.42           | 0.82           | 0.08                 | 0.78           | 0.98           |
| Margaric acid          | 0.14                          | 0.60           | 0.91           | -0.17                            | 0.54           | 0.88           | -0.04                | 0.88           | 0.98           |
| Pentadecanoic acid     | 0.10                          | 0.70           | 0.96           | -0.05                            | 0.84           | 0.98           | 0.06                 | 0.83           | 0.98           |
| Cholesterol            | -0.15                         | 0.59           | 0.91           | -0.31                            | 0.24           | 0.67           | -0.10                | 0.71           | 0.96           |
| Cobalamin              | -0.15                         | 0.59           | 0.91           | -0.38                            | 0.14           | 0.56           | -0.12                | 0.66           | 0.94           |
| Niacin                 | 0.43                          | 0.09           | 0.53           | 0.02                             | 0.95           | 0.99           | 0.42                 | 0.11           | 0.54           |
| Animal-derived Protein | -0.01                         | 0.98           | 1.00           | -0.15                            | 0.57           | 0.90           | -0.04                | 0.87           | 0.99           |
| Folic acid             | 0.19                          | 0.48           | 0.86           | 0.01                             | 0.96           | 0.99           | 0.28                 | 0.29           | 0.70           |
| Glucose                | 0.05                          | 0.85           | 0.98           | 0.25                             | 0.36           | 0.77           | -0.07                | 0.79           | 0.97           |
| Plant-derived Protein  | 0.33                          | 0.22           | 0.65           | 0.27                             | 0.32           | 0.73           | 0.30                 | 0.25           | 0.66           |
| Fiber                  | 0.42                          | 0.10           | 0.52           | 0.51                             | <b>0.04</b>    | 0.44           | 0.39                 | 0.13           | 0.57           |

Supplemental Table 7 (continued)

|                        | g_Dorea              |                |                | g_Lachnoclostridium  |                |                | g_Lachnospiraceae_ND3007_group |                |                |
|------------------------|----------------------|----------------|----------------|----------------------|----------------|----------------|--------------------------------|----------------|----------------|
|                        | Spearman Correlation | <i>p</i> value | <i>q</i> value | Spearman Correlation | <i>p</i> value | <i>q</i> value | Spearman Correlation           | <i>p</i> value | <i>q</i> value |
| Tryptophan             | 0.20                 | 0.46           | 0.84           | 0.52                 | <b>0.04</b>    | 0.44           | 0.15                           | 0.59           | 0.91           |
| Histidine              | 0.08                 | 0.77           | 0.97           | 0.63                 | <b>0.01</b>    | 0.29           | 0.07                           | 0.80           | 0.97           |
| Lysine                 | 0.03                 | 0.92           | 0.98           | 0.56                 | <b>0.02</b>    | 0.42           | 0.03                           | 0.90           | 0.98           |
| Methionine             | 0.13                 | 0.62           | 0.92           | 0.52                 | <b>0.04</b>    | 0.43           | 0.06                           | 0.82           | 0.98           |
| Lignoceric acid        | -0.06                | 0.82           | 0.98           | -0.12                | 0.66           | 0.94           | 0.16                           | 0.55           | 0.90           |
| Docosahexaenoic Acid   | 0.11                 | 0.68           | 0.96           | 0.38                 | 0.14           | 0.56           | -0.02                          | 0.94           | 0.99           |
| Clupanodonic acid      | 0.24                 | 0.38           | 0.79           | 0.35                 | 0.19           | 0.63           | 0.04                           | 0.88           | 0.98           |
| Arachidonic acid       | 0.16                 | 0.56           | 0.90           | 0.35                 | 0.18           | 0.62           | <b>&lt;0.01</b>                | 1.00           | 1.00           |
| Erucic acid            | 0.14                 | 0.60           | 0.91           | 0.62                 | <b>0.01</b>    | 0.28           | -0.10                          | 0.71           | 0.96           |
| Gadoleic acid          | 0.15                 | 0.58           | 0.91           | 0.47                 | 0.07           | 0.49           | 0.05                           | 0.85           | 0.98           |
| Palmitic acid          | 0.26                 | 0.33           | 0.74           | 0.55                 | <b>0.03</b>    | 0.43           | 0.14                           | 0.60           | 0.91           |
| Margaric acid          | 0.06                 | 0.83           | 0.98           | 0.48                 | 0.06           | 0.48           | -0.03                          | 0.92           | 0.98           |
| Pentadecanoic acid     | 0.06                 | 0.82           | 0.98           | 0.48                 | 0.06           | 0.48           | -0.03                          | 0.91           | 0.99           |
| Cholesterol            | 0.14                 | 0.61           | 0.92           | 0.33                 | 0.22           | 0.65           | -0.01                          | 0.97           | 0.99           |
| Cobalamin              | -0.03                | 0.92           | 0.98           | 0.43                 | 0.10           | 0.52           | -0.14                          | 0.60           | 0.91           |
| Niacin                 | 0.23                 | 0.40           | 0.81           | 0.54                 | <b>0.03</b>    | 0.43           | 0.28                           | 0.29           | 0.70           |
| Animal-derived Protein | 0.12                 | 0.67           | 0.94           | 0.65                 | <b>0.01</b>    | 0.44           | 0.05                           | 0.85           | 0.98           |
| Folic acid             | -0.10                | 0.71           | 0.96           | -0.32                | 0.23           | 0.66           | -0.06                          | 0.83           | 0.98           |
| Glucose                | <b>&lt;0.01</b>      | 0.99           | 1.00           | -0.31                | 0.25           | 0.66           | 0.34                           | 0.20           | 0.63           |
| Plant-derived Protein  | -0.03                | 0.91           | 0.99           | -0.55                | <b>0.03</b>    | 0.42           | 0.02                           | 0.93           | 0.99           |
| Fiber                  | 0.09                 | 0.74           | 0.97           | -0.38                | 0.15           | 0.57           | 0.21                           | 0.45           | 0.83           |

Supplemental Table 7 (continued)

|                        | g_Lactonifactor      |                |                | g_Marvinbryantia     |                |                | g_Intestinibacter    |                |                |
|------------------------|----------------------|----------------|----------------|----------------------|----------------|----------------|----------------------|----------------|----------------|
|                        | Spearman Correlation | <i>p</i> value | <i>q</i> value | Spearman Correlation | <i>p</i> value | <i>q</i> value | Spearman Correlation | <i>p</i> value | <i>q</i> value |
| Tryptophan             | 0.37                 | 0.15           | 0.57           | 0.41                 | 0.12           | 0.56           | 0.24                 | 0.37           | 0.79           |
| Histidine              | 0.44                 | 0.09           | 0.51           | 0.36                 | 0.17           | 0.60           | 0.19                 | 0.49           | 0.85           |
| Lysine                 | 0.39                 | 0.13           | 0.56           | 0.38                 | 0.15           | 0.57           | 0.19                 | 0.48           | 0.86           |
| Methionine             | 0.41                 | 0.12           | 0.56           | 0.36                 | 0.17           | 0.59           | 0.04                 | 0.89           | 0.98           |
| Lignoceric acid        | 0.27                 | 0.32           | 0.73           | -0.09                | 0.73           | 0.97           | 0.36                 | 0.18           | 0.62           |
| Docosahexaenoic Acid   | 0.26                 | 0.32           | 0.74           | 0.35                 | 0.18           | 0.62           | -0.23                | 0.39           | 0.81           |
| Clupanodonic acid      | 0.33                 | 0.22           | 0.65           | 0.39                 | 0.13           | 0.56           | -0.23                | 0.40           | 0.81           |
| Arachidonic acid       | 0.30                 | 0.26           | 0.66           | 0.40                 | 0.12           | 0.57           | -0.22                | 0.40           | 0.81           |
| Erucic acid            | 0.09                 | 0.73           | 0.97           | 0.45                 | 0.08           | 0.50           | 0.01                 | 0.98           | 1.00           |
| Gadoleic acid          | 0.45                 | 0.08           | 0.51           | 0.38                 | 0.14           | 0.56           | 0.01                 | 0.96           | 0.99           |
| Palmitic acid          | 0.16                 | 0.56           | 0.90           | 0.50                 | <b>0.05</b>    | 0.45           | -0.09                | 0.75           | 0.97           |
| Margaric acid          | 0.31                 | 0.25           | 0.67           | 0.35                 | 0.18           | 0.63           | -0.10                | 0.70           | 0.96           |
| Pentadecanoic acid     | 0.25                 | 0.36           | 0.77           | 0.19                 | 0.47           | 0.85           | 0.14                 | 0.62           | 0.92           |
| Cholesterol            | 0.20                 | 0.46           | 0.84           | 0.34                 | 0.19           | 0.63           | -0.26                | 0.33           | 0.74           |
| Cobalamin              | 0.40                 | 0.12           | 0.57           | 0.30                 | 0.26           | 0.66           | -0.15                | 0.57           | 0.90           |
| Niacin                 | 0.30                 | 0.26           | 0.66           | 0.53                 | <b>0.03</b>    | 0.42           | 0.22                 | 0.41           | 0.82           |
| Animal-derived Protein | 0.40                 | 0.12           | 0.57           | 0.33                 | 0.21           | 0.65           | -0.19                | 0.48           | 0.86           |
| Folic acid             | -0.17                | 0.52           | 0.88           | 0.04                 | 0.88           | 0.99           | 0.38                 | 0.15           | 0.57           |
| Glucose                | -0.23                | 0.39           | 0.81           | -0.33                | 0.21           | 0.64           | 0.01                 | 0.98           | 1.00           |
| Plant-derived Protein  | -0.09                | 0.73           | 0.97           | -0.11                | 0.69           | 0.96           | 0.24                 | 0.37           | 0.79           |
| Fiber                  | -0.19                | 0.49           | 0.85           | -0.13                | 0.63           | 0.93           | 0.18                 | 0.51           | 0.86           |

Supplemental Table 7 (continued)

|                           | g_Romboutsia            |                 |                | g_[Eubacterium]_coprostanoligenes_group |                |                | g_Faecalibacterium      |                |                |
|---------------------------|-------------------------|-----------------|----------------|-----------------------------------------|----------------|----------------|-------------------------|----------------|----------------|
|                           | Spearman<br>Correlation | <i>p</i> value  | <i>q</i> value | Spearman<br>Correlation                 | <i>p</i> value | <i>q</i> value | Spearman<br>Correlation | <i>p</i> value | <i>q</i> value |
| Tryptophan                | 0.65                    | 0.01            | 0.41           | -0.08                                   | 0.77           | 0.97           | 0.11                    | 0.69           | 0.96           |
| Histidine                 | 0.64                    | 0.01            | 0.32           | -0.06                                   | 0.82           | 0.98           | 0.09                    | 0.73           | 0.97           |
| Lysine                    | 0.68                    | <b>&lt;0.01</b> | 0.41           | -0.16                                   | 0.57           | 0.90           | -0.03                   | 0.90           | 0.98           |
| Methionine                | 0.64                    | <b>0.01</b>     | 0.33           | 0.05                                    | 0.86           | 0.98           | 0.04                    | 0.88           | 0.99           |
| Lignoceric acid           | 0.01                    | 0.96            | 0.99           | -0.01                                   | 0.99           | 1.00           | 0.38                    | 0.15           | 0.57           |
| Docosahexaenoic Acid      | 0.44                    | 0.09            | 0.52           | 0.11                                    | 0.69           | 0.96           | -0.20                   | 0.46           | 0.84           |
| Clupanodonic acid         | 0.35                    | 0.19            | 0.63           | 0.23                                    | 0.38           | 0.80           | -0.13                   | 0.63           | 0.93           |
| Arachidonic acid          | 0.51                    | <b>0.04</b>     | 0.44           | 0.14                                    | 0.60           | 0.91           | -0.16                   | 0.55           | 0.90           |
| Erucic acid               | 0.38                    | 0.14            | 0.56           | -0.35                                   | 0.18           | 0.62           | -0.25                   | 0.35           | 0.77           |
| Gadoleic acid             | 0.51                    | <b>0.04</b>     | 0.44           | 0.05                                    | 0.84           | 0.98           | -0.07                   | 0.80           | 0.97           |
| Palmitic acid             | 0.60                    | <b>0.01</b>     | 0.31           | 0.02                                    | 0.94           | 0.99           | -0.09                   | 0.75           | 0.97           |
| Margaric acid             | 0.41                    | 0.12            | 0.56           | 0.11                                    | 0.68           | 0.95           | -0.02                   | 0.94           | 0.99           |
| Pentadecanoic acid        | 0.28                    | 0.29            | 0.70           | 0.12                                    | 0.66           | 0.94           | 0.06                    | 0.82           | 0.98           |
| Cholesterol               | 0.52                    | <b>0.04</b>     | 0.43           | 0.11                                    | 0.69           | 0.96           | -0.09                   | 0.73           | 0.97           |
| Cobalamin                 | 0.45                    | 0.08            | 0.51           | 0.07                                    | 0.78           | 0.97           | -0.15                   | 0.57           | 0.90           |
| Niacin                    | 0.72                    | <b>&lt;0.01</b> | 0.24           | -0.08                                   | 0.78           | 0.98           | 0.09                    | 0.75           | 0.97           |
| Animal-derived<br>Protein | 0.50                    | <b>0.05</b>     | 0.45           | 0.18                                    | 0.51           | 0.86           | 0.04                    | 0.89           | 0.98           |
| Folic acid                | 0.19                    | 0.49            | 0.85           | -0.31                                   | 0.24           | 0.66           | -0.09                   | 0.74           | 0.97           |
| Glucose                   | -0.18                   | 0.51            | 0.86           | 0.21                                    | 0.44           | 0.83           | 0.37                    | 0.16           | 0.57           |
| Plant-derived Protein     | -0.10                   | 0.70            | 0.96           | -0.15                                   | 0.59           | 0.91           | 0.12                    | 0.66           | 0.94           |
| Fiber                     | -0.05                   | 0.85            | 0.98           | -0.02                                   | 0.94           | 0.99           | 0.39                    | 0.14           | 0.56           |

Supplemental Table 7 (continued)

|                        | g_Ruminiclostridium_5 |                 |                | g_Ruminiclostridium_9 |                 |                | g_Ruminococcaceae_UCG_014 |                |                |
|------------------------|-----------------------|-----------------|----------------|-----------------------|-----------------|----------------|---------------------------|----------------|----------------|
|                        | Spearman Correlation  | <i>p</i> value  | <i>q</i> value | Spearman Correlation  | <i>p</i> value  | <i>q</i> value | Spearman Correlation      | <i>p</i> value | <i>q</i> value |
| Tryptophan             | 0.62                  | 0.01            | 0.29           | 0.45                  | 0.08            | 0.50           | -0.02                     | 0.93           | 0.99           |
| Histidine              | 0.67                  | <b>&lt;0.01</b> | 0.41           | 0.63                  | 0.01            | 0.28           | -0.07                     | 0.79           | 0.97           |
| Lysine                 | 0.58                  | <b>0.02</b>     | 0.36           | 0.55                  | <b>0.03</b>     | 0.42           | -0.08                     | 0.77           | 0.98           |
| Methionine             | 0.63                  | <b>0.01</b>     | 0.27           | 0.53                  | <b>0.03</b>     | 0.43           | -0.10                     | 0.72           | 0.97           |
| Lignoceric acid        | 0.02                  | 0.94            | 0.99           | -0.23                 | 0.40            | 0.81           | -0.06                     | 0.81           | 0.98           |
| Docosahexaenoic Acid   | 0.43                  | 0.10            | 0.52           | 0.36                  | 0.18            | 0.62           | -0.13                     | 0.64           | 0.93           |
| Clupanodonic acid      | 0.49                  | 0.05            | 0.45           | 0.39                  | 0.14            | 0.56           | 0.04                      | 0.90           | 0.98           |
| Arachidonic acid       | 0.43                  | 0.10            | 0.52           | 0.31                  | 0.25            | 0.67           | -0.12                     | 0.67           | 0.94           |
| Erucic acid            | 0.31                  | 0.23            | 0.66           | 0.49                  | 0.06            | 0.46           | -0.07                     | 0.80           | 0.98           |
| Gadoleic acid          | 0.58                  | <b>0.02</b>     | 0.36           | 0.47                  | 0.07            | 0.48           | -0.10                     | 0.71           | 0.96           |
| Palmitic acid          | 0.49                  | 0.06            | 0.45           | 0.49                  | 0.05            | 0.46           | 0.14                      | 0.60           | 0.91           |
| Margaric acid          | 0.62                  | <b>0.01</b>     | 0.28           | 0.75                  | <b>&lt;0.01</b> | 0.18           | -0.10                     | 0.72           | 0.97           |
| Pentadecanoic acid     | 0.55                  | <b>0.03</b>     | 0.42           | 0.78                  | <b>&lt;0.01</b> | 0.14           | -0.06                     | 0.83           | 0.98           |
| Cholesterol            | 0.34                  | 0.20            | 0.63           | 0.28                  | 0.29            | 0.70           | -0.09                     | 0.73           | 0.97           |
| Cobalamin              | 0.53                  | <b>0.03</b>     | 0.43           | 0.54                  | <b>0.03</b>     | 0.43           | -0.13                     | 0.62           | 0.93           |
| Niacin                 | 0.55                  | <b>0.03</b>     | 0.43           | 0.39                  | 0.13            | 0.56           | 0.27                      | 0.32           | 0.73           |
| Animal-derived Protein | 0.63                  | <b>0.01</b>     | 0.28           | 0.58                  | <b>0.02</b>     | 0.37           | 0.03                      | 0.91           | 0.98           |
| Folic acid             | -0.29                 | 0.28            | 0.69           | -0.06                 | 0.83            | 0.98           | -0.05                     | 0.86           | 0.98           |
| Glucose                | -0.33                 | 0.21            | 0.63           | -0.47                 | 0.07            | 0.48           | 0.40                      | 0.13           | 0.57           |
| Plant-derived Protein  | -0.30                 | 0.26            | 0.66           | -0.47                 | 0.07            | 0.48           | -0.16                     | 0.56           | 0.90           |
| Fiber                  | -0.30                 | 0.25            | 0.66           | -0.43                 | 0.09            | 0.53           | 0.11                      | 0.69           | 0.96           |



Supplemental Table 7 (continued)

|                        | g_Coprobacillus      |                |                | g_Erysipelatoclostridium |                |                | g_Erysipelotrichaceae_UCG_003 |                |                |
|------------------------|----------------------|----------------|----------------|--------------------------|----------------|----------------|-------------------------------|----------------|----------------|
|                        | Spearman Correlation | <i>p</i> value | <i>q</i> value | Spearman Correlation     | <i>p</i> value | <i>q</i> value | Spearman Correlation          | <i>p</i> value | <i>q</i> value |
| Tryptophan             | 0.41                 | 0.11           | 0.56           | 0.13                     | 0.63           | 0.93           | 0.28                          | 0.30           | 0.71           |
| Histidine              | 0.52                 | 0.04           | 0.43           | 0.06                     | 0.83           | 0.98           | 0.35                          | 0.18           | 0.62           |
| Lysine                 | 0.46                 | 0.07           | 0.50           | 0.12                     | 0.67           | 0.94           | 0.25                          | 0.35           | 0.77           |
| Methionine             | 0.48                 | 0.06           | 0.47           | 0.26                     | 0.34           | 0.75           | 0.12                          | 0.67           | 0.94           |
| Lignoceric acid        | 0.29                 | 0.27           | 0.67           | -0.26                    | 0.33           | 0.73           | 0.43                          | 0.09           | 0.53           |
| Docosahexaenoic Acid   | 0.35                 | 0.18           | 0.63           | 0.32                     | 0.22           | 0.65           | -0.17                         | 0.52           | 0.88           |
| Clupanodonic acid      | 0.32                 | 0.23           | 0.66           | 0.21                     | 0.44           | 0.83           | -0.19                         | 0.49           | 0.85           |
| Arachidonic acid       | 0.39                 | 0.14           | 0.56           | 0.35                     | 0.18           | 0.62           | -0.12                         | 0.65           | 0.94           |
| Erucic acid            | 0.21                 | 0.44           | 0.83           | -0.22                    | 0.41           | 0.82           | 0.18                          | 0.49           | 0.85           |
| Gadoleic acid          | 0.49                 | 0.06           | 0.46           | 0.07                     | 0.79           | 0.97           | 0.12                          | 0.65           | 0.94           |
| Palmitic acid          | 0.19                 | 0.48           | 0.86           | 0.17                     | 0.53           | 0.88           | 0.04                          | 0.87           | 0.99           |
| Margaric acid          | 0.47                 | 0.07           | 0.49           | -0.05                    | 0.86           | 0.98           | 0.21                          | 0.43           | 0.83           |
| Pentadecanoic acid     | 0.39                 | 0.14           | 0.56           | 0.08                     | 0.77           | 0.97           | 0.16                          | 0.55           | 0.90           |
| Cholesterol            | 0.31                 | 0.24           | 0.66           | 0.35                     | 0.19           | 0.63           | -0.14                         | 0.60           | 0.91           |
| Cobalamin              | 0.50                 | <b>0.05</b>    | 0.45           | 0.42                     | 0.11           | 0.53           | -0.13                         | 0.63           | 0.92           |
| Niacin                 | 0.28                 | 0.29           | 0.70           | 0.17                     | 0.53           | 0.87           | 0.30                          | 0.26           | 0.66           |
| Animal-derived Protein | 0.40                 | 0.13           | 0.56           | 0.24                     | 0.36           | 0.78           | <b>&lt;0.01</b>               | 0.99           | 1.00           |
| Folic acid             | <b>&lt;0.01</b>      | 1.00           | 1.00           | -0.14                    | 0.60           | 0.91           | 0.30                          | 0.25           | 0.66           |
| Glucose                | -0.31                | 0.25           | 0.66           | 0.17                     | 0.52           | 0.87           | -0.02                         | 0.96           | 0.99           |
| Plant-derived Protein  | <b>&lt;0.01</b>      | 1.00           | 1.00           | -0.23                    | 0.39           | 0.81           | 0.21                          | 0.43           | 0.83           |
| Fiber                  | -0.20                | 0.46           | 0.84           | -0.37                    | 0.16           | 0.58           | 0.39                          | 0.14           | 0.56           |

Supplemental Table 7 (continued)

|                        | g_Holdemanella       |                |                | g_Holdemania         |                |                | g_Turicibacter       |                |                |
|------------------------|----------------------|----------------|----------------|----------------------|----------------|----------------|----------------------|----------------|----------------|
|                        | Spearman Correlation | <i>p</i> value | <i>q</i> value | Spearman Correlation | <i>p</i> value | <i>q</i> value | Spearman Correlation | <i>p</i> value | <i>q</i> value |
| Tryptophan             | 0.31                 | 0.24           | 0.66           | 0.42                 | 0.10           | 0.53           | 0.31                 | 0.24           | 0.66           |
| Histidine              | 0.21                 | 0.43           | 0.83           | 0.58                 | 0.02           | 0.35           | 0.31                 | 0.24           | 0.67           |
| Lysine                 | 0.26                 | 0.33           | 0.74           | 0.51                 | <b>0.04</b>    | 0.44           | 0.37                 | 0.15           | 0.57           |
| Methionine             | 0.40                 | 0.13           | 0.57           | 0.49                 | 0.05           | 0.46           | 0.18                 | 0.52           | 0.87           |
| Lignoceric acid        | -0.29                | 0.27           | 0.67           | -0.04                | 0.88           | 0.98           | 0.04                 | 0.89           | 0.98           |
| Docosahexaenoic Acid   | 0.48                 | 0.06           | 0.46           | 0.38                 | 0.15           | 0.56           | -0.09                | 0.75           | 0.97           |
| Clupanodonic acid      | 0.39                 | 0.14           | 0.56           | 0.28                 | 0.30           | 0.72           | -0.24                | 0.38           | 0.79           |
| Arachidonic acid       | 0.54                 | <b>0.03</b>    | 0.43           | 0.44                 | 0.09           | 0.51           | -0.03                | 0.91           | 0.99           |
| Erucic acid            | 0.12                 | 0.65           | 0.94           | 0.22                 | 0.42           | 0.82           | 0.14                 | 0.61           | 0.92           |
| Gadoleic acid          | 0.31                 | 0.24           | 0.66           | 0.47                 | 0.07           | 0.48           | 0.02                 | 0.95           | 0.99           |
| Palmitic acid          | 0.47                 | 0.06           | 0.48           | 0.34                 | 0.19           | 0.63           | 0.21                 | 0.44           | 0.83           |
| Margaric acid          | 0.19                 | 0.48           | 0.85           | 0.56                 | <b>0.02</b>    | 0.42           | 0.08                 | 0.76           | 0.97           |
| Pentadecanoic acid     | 0.03                 | 0.90           | 0.98           | 0.43                 | 0.10           | 0.53           | 0.05                 | 0.85           | 0.98           |
| Cholesterol            | 0.54                 | <b>0.03</b>    | 0.43           | 0.34                 | 0.20           | 0.63           | 0.03                 | 0.92           | 0.98           |
| Cobalamin              | 0.36                 | 0.17           | 0.61           | 0.44                 | 0.08           | 0.51           | -0.03                | 0.91           | 0.99           |
| Niacin                 | 0.40                 | 0.13           | 0.56           | 0.31                 | 0.25           | 0.66           | 0.43                 | 0.10           | 0.52           |
| Animal-derived Protein | 0.31                 | 0.24           | 0.67           | 0.40                 | 0.13           | 0.56           | -0.05                | 0.84           | 0.98           |
| Folic acid             | 0.01                 | 0.98           | 1.00           | 0.20                 | 0.45           | 0.83           | 0.63                 | <b>0.01</b>    | 0.27           |
| Glucose                | 0.19                 | 0.49           | 0.86           | -0.26                | 0.33           | 0.74           | <b>&lt;0.01</b>      | 0.99           | 1.00           |
| Plant-derived Protein  | -0.07                | 0.81           | 0.98           | -0.06                | 0.84           | 0.98           | 0.20                 | 0.45           | 0.83           |
| Fiber                  | -0.15                | 0.59           | 0.91           | -0.14                | 0.59           | 0.91           | 0.32                 | 0.23           | 0.66           |

Supplemental Table 7 (continued)

|                        | g_Phascolarctobacterium |                |                | g_Bilophila          |                 |                | g_Enterobacter       |                |                |
|------------------------|-------------------------|----------------|----------------|----------------------|-----------------|----------------|----------------------|----------------|----------------|
|                        | Spearman Correlation    | <i>p</i> value | <i>q</i> value | Spearman Correlation | <i>p</i> value  | <i>q</i> value | Spearman Correlation | <i>p</i> value | <i>q</i> value |
| Tryptophan             | 0.20                    | 0.45           | 0.83           | 0.15                 | 0.58            | 0.91           | 0.53                 | 0.04           | 0.43           |
| Histidine              | 0.33                    | 0.21           | 0.64           | 0.26                 | 0.33            | 0.74           | 0.37                 | 0.16           | 0.57           |
| Lysine                 | 0.22                    | 0.41           | 0.82           | 0.22                 | 0.41            | 0.82           | 0.43                 | 0.10           | 0.52           |
| Methionine             | 0.15                    | 0.57           | 0.90           | 0.32                 | 0.22            | 0.65           | 0.33                 | 0.21           | 0.64           |
| Lignoceric acid        | -0.10                   | 0.72           | 0.97           | -0.47                | 0.07            | 0.47           | 0.02                 | 0.94           | 0.99           |
| Docosahexaenoic Acid   | 0.04                    | 0.88           | 0.99           | 0.51                 | 0.04            | 0.44           | 0.19                 | 0.48           | 0.85           |
| Clupanodonic acid      | 0.05                    | 0.85           | 0.98           | 0.45                 | 0.08            | 0.50           | 0.10                 | 0.70           | 0.96           |
| Arachidonic acid       | -0.02                   | 0.95           | 0.99           | 0.44                 | 0.08            | 0.51           | 0.16                 | 0.56           | 0.90           |
| Erucic acid            | 0.59                    | <b>0.02</b>    | 0.36           | 0.37                 | 0.15            | 0.57           | 0.18                 | 0.50           | 0.86           |
| Gadoleic acid          | 0.09                    | 0.74           | 0.97           | 0.24                 | 0.37            | 0.79           | 0.34                 | 0.20           | 0.63           |
| Palmitic acid          | 0.30                    | 0.26           | 0.66           | 0.43                 | 0.10            | 0.52           | 0.13                 | 0.63           | 0.93           |
| Margaric acid          | 0.28                    | 0.29           | 0.71           | 0.50                 | <b>0.05</b>     | 0.45           | 0.12                 | 0.65           | 0.94           |
| Pentadecanoic acid     | 0.47                    | 0.07           | 0.48           | 0.53                 | <b>0.03</b>     | 0.43           | 0.07                 | 0.79           | 0.97           |
| Cholesterol            | 0.04                    | 0.88           | 0.99           | 0.41                 | 0.11            | 0.54           | -0.01                | 0.96           | 0.99           |
| Cobalamin              | 0.08                    | 0.76           | 0.97           | 0.59                 | <b>0.02</b>     | 0.35           | 0.21                 | 0.42           | 0.83           |
| Niacin                 | 0.19                    | 0.48           | 0.86           | 0.16                 | 0.55            | 0.90           | 0.39                 | 0.14           | 0.56           |
| Animal-derived Protein | 0.32                    | 0.22           | 0.65           | 0.53                 | <b>0.04</b>     | 0.42           | -0.03                | 0.92           | 0.98           |
| Folic acid             | -0.16                   | 0.56           | 0.90           | -0.40                | 0.13            | 0.57           | 0.16                 | 0.55           | 0.90           |
| Glucose                | -0.24                   | 0.38           | 0.79           | -0.29                | 0.28            | 0.70           | -0.21                | 0.44           | 0.83           |
| Plant-derived Protein  | -0.44                   | 0.09           | 0.51           | -0.59                | <b>0.02</b>     | 0.36           | 0.30                 | 0.25           | 0.66           |
| Fiber                  | -0.19                   | 0.49           | 0.85           | -0.72                | <b>&lt;0.01</b> | 0.21           | -0.18                | 0.51           | 0.86           |

Supplemental Table 7 (continued)

| Species                | s_Bacteroides_coprocola_DSM_17136 |                |                | s_Bifidobacterium_longum_subsp_longum |                |                | s_Parabacteroides_merdae |                |                |
|------------------------|-----------------------------------|----------------|----------------|---------------------------------------|----------------|----------------|--------------------------|----------------|----------------|
|                        | Spearman Correlation              | <i>p</i> value | <i>q</i> value | Spearman Correlation                  | <i>p</i> value | <i>q</i> value | Spearman Correlation     | <i>p</i> value | <i>q</i> value |
| Tryptophan             | -0.31                             | 0.25           | 0.69           | 0.19                                  | 0.49           | 1.00           | 0.18                     | 0.49           | 1.00           |
| Histidine              | -0.43                             | 0.10           | 0.54           | 0.09                                  | 0.75           | 1.00           | 0.26                     | 0.34           | 0.99           |
| Lysine                 | -0.49                             | 0.05           | 0.54           | 0.07                                  | 0.80           | 1.00           | 0.20                     | 0.46           | 1.00           |
| Methionine             | -0.40                             | 0.12           | 0.51           | 0.17                                  | 0.53           | 1.00           | 0.22                     | 0.42           | 1.00           |
| Lignoceric acid        | 0.08                              | 0.77           | 0.93           | 0.04                                  | 0.90           | 1.00           | 0.10                     | 0.71           | 1.00           |
| Docosahexaenoic Acid   | -0.21                             | 0.44           | 0.75           | 0.09                                  | 0.73           | 1.00           | -0.07                    | 0.80           | 1.00           |
| Clupanodonic acid      | -0.35                             | 0.19           | 0.64           | 0.05                                  | 0.86           | 1.00           | -0.04                    | 0.89           | 1.00           |
| Arachidonic acid       | -0.27                             | 0.31           | 0.69           | 0.17                                  | 0.54           | 1.00           | -0.10                    | 0.73           | 1.00           |
| Erucic acid            | -0.22                             | 0.42           | 0.73           | 0.07                                  | 0.78           | 1.00           | 0.05                     | 0.84           | 1.00           |
| Gadoleic acid          | -0.49                             | 0.06           | 0.51           | -0.01                                 | 0.98           | 1.00           | -0.04                    | 0.88           | 1.00           |
| Palmitic acid          | -0.42                             | 0.10           | 0.54           | 0.20                                  | 0.46           | 0.98           | 0.27                     | 0.31           | 0.97           |
| Margaric acid          | -0.39                             | 0.14           | 0.55           | 0.10                                  | 0.72           | 1.00           | 0.43                     | 0.09           | 0.63           |
| Pentadecanoic acid     | -0.25                             | 0.35           | 0.72           | 0.08                                  | 0.76           | 1.00           | 0.61                     | <b>0.01</b>    | 0.49           |
| Cholesterol            | -0.25                             | 0.34           | 0.72           | 0.29                                  | 0.28           | 0.94           | 0.14                     | 0.59           | 1.00           |
| Cobalamin              | -0.29                             | 0.28           | 0.70           | 0.04                                  | 0.89           | 1.00           | 0.06                     | 0.82           | 1.00           |
| Niacin                 | -0.47                             | 0.07           | 0.54           | 0.15                                  | 0.58           | 1.00           | 0.28                     | 0.29           | 0.95           |
| Animal-derived Protein | -0.41                             | 0.12           | 0.56           | 0.03                                  | 0.91           | 1.00           | 0.17                     | 0.53           | 1.00           |
| Folic acid             | -0.23                             | 0.40           | 0.74           | 0.23                                  | 0.40           | 0.96           | 0.34                     | 0.20           | 0.89           |
| Glucose                | 0.28                              | 0.30           | 0.70           | -0.01                                 | 0.97           | 1.00           | 0.21                     | 0.45           | 1.00           |
| Plant-derived Protein  | 0.31                              | 0.24           | 0.73           | 0.23                                  | 0.40           | 0.96           | -0.09                    | 0.74           | 1.00           |
| Fiber                  | 0.06                              | 0.82           | 0.95           | 0.29                                  | 0.28           | 0.94           | 0.23                     | 0.39           | 1.00           |

Supplemental Table 7 (continued)

|                        | s_bacterium_NLAE_zl_C326 |                |                | s_Actinomyces_odontolyticus |                |                | s_Streptococcus_mutans |                |                |
|------------------------|--------------------------|----------------|----------------|-----------------------------|----------------|----------------|------------------------|----------------|----------------|
|                        | Spearman Correlation     | <i>p</i> value | <i>q</i> value | Spearman Correlation        | <i>p</i> value | <i>q</i> value | Spearman Correlation   | <i>p</i> value | <i>q</i> value |
| Tryptophan             | 0.37                     | 0.16           | 0.88           | 0.53                        | 0.04           | 0.57           | 0.13                   | 0.64           | 1.00           |
| Histidine              | 0.46                     | 0.07           | 0.67           | 0.62                        | 0.01           | 1.00           | 0.09                   | 0.73           | 1.00           |
| Lysine                 | 0.50                     | 0.05           | 0.63           | 0.59                        | <b>0.02</b>    | 0.70           | 0.07                   | 0.79           | 1.00           |
| Methionine             | 0.46                     | 0.07           | 0.61           | 0.62                        | <b>0.01</b>    | 1.00           | 0.36                   | 0.17           | 1.00           |
| Lignoceric acid        | 0.09                     | 0.75           | 1.00           | 0.24                        | 0.37           | 1.00           | -0.02                  | 0.95           | 1.00           |
| Docosahexaenoic Acid   | 0.26                     | 0.34           | 1.00           | 0.33                        | 0.21           | 1.00           | 0.40                   | 0.12           | 1.00           |
| Clupanodonic acid      | 0.21                     | 0.42           | 1.00           | 0.28                        | 0.29           | 1.00           | 0.29                   | 0.28           | 1.00           |
| Arachidonic acid       | 0.33                     | 0.22           | 0.98           | 0.35                        | 0.19           | 1.00           | 0.46                   | 0.07           | 1.00           |
| Erucic acid            | 0.15                     | 0.58           | 1.00           | 0.11                        | 0.69           | 1.00           | -0.33                  | 0.22           | 1.00           |
| Gadoleic acid          | 0.30                     | 0.26           | 1.00           | 0.45                        | 0.08           | 0.92           | 0.17                   | 0.53           | 1.00           |
| Palmitic acid          | 0.36                     | 0.17           | 0.91           | 0.30                        | 0.26           | 1.00           | 0.14                   | 0.60           | 1.00           |
| Margaric acid          | 0.31                     | 0.25           | 1.00           | 0.54                        | <b>0.03</b>    | 0.77           | 0.25                   | 0.36           | 1.00           |
| Pentadecanoic acid     | 0.20                     | 0.46           | 1.00           | 0.48                        | 0.06           | 0.83           | 0.23                   | 0.39           | 1.00           |
| Cholesterol            | 0.41                     | 0.12           | 0.78           | 0.39                        | 0.14           | 1.00           | 0.54                   | <b>0.03</b>    | 1.00           |
| Cobalamin              | 0.46                     | 0.07           | 0.61           | 0.55                        | <b>0.03</b>    | 0.89           | 0.41                   | 0.12           | 1.00           |
| Niacin                 | 0.49                     | 0.06           | 0.64           | 0.42                        | 0.11           | 1.00           | -0.01                  | 0.97           | 1.00           |
| Animal-derived Protein | 0.52                     | <b>0.04</b>    | 0.53           | 0.54                        | <b>0.03</b>    | 0.58           | 0.23                   | 0.39           | 1.00           |
| Folic acid             | <b>&lt;0.01</b>          | 0.99           | 1.00           | -0.06                       | 0.84           | 1.00           | 0.02                   | 0.95           | 1.00           |
| Glucose                | -0.17                    | 0.53           | 1.00           | -0.31                       | 0.24           | 1.00           | 0.25                   | 0.35           | 1.00           |
| Plant-derived Protein  | -0.27                    | 0.31           | 1.00           | -0.13                       | 0.63           | 1.00           | 0.11                   | 0.69           | 1.00           |
| Fiber                  | -0.06                    | 0.83           | 1.00           | -0.12                       | 0.65           | 1.00           | -0.06                  | 0.83           | 1.00           |
